# Multi-omics profiling of CHO parental hosts reveals cell line-specific variations in bioprocessing traits

Meiyappan Lakshmanan<sup>1</sup>, Yee Jiun Kok<sup>1</sup>, Alison P. Lee<sup>1</sup>, Sarantos Kyriakopoulos<sup>1</sup>, Hsueh Lee Lim<sup>1</sup>, Gavin Teo<sup>1</sup>, Swan Li Poh<sup>1</sup>, Wen Qin Tang<sup>1</sup>, Jongkwang Hong<sup>1</sup>, Andy Hee-Meng Tan<sup>1</sup>, Xuezhi Bi<sup>1</sup>, Ying Swan Ho<sup>1</sup>, Peiqing Zhang<sup>1</sup>, Say Kong Ng<sup>1</sup>, Dong-Yup Lee<sup>1,2</sup>

<sup>1</sup>Bioprocessing Technology Institute, Agency for Science, Technology and Research (A\*STAR),  
20 Biopolis Way, #06-01, Centros 138668, Singapore

<sup>2</sup>School of Chemical Engineering, Sungkyunkwan University, 2066, Seobu-ro, Jangan-gu,  
Suwon-si, Gyeonggi-do 16419, Republic of Korea; telephone: +82-31-290-7253; fax: +82-31-  
290-7272; e-mail: dongyuplee@skku.edu

Correspondence to: D.-Y. Lee

Contract grant sponsor: Agency for Science, Technology and Research, Singapore

Contract grant sponsor: Next-Generation BioGreen 21 Program, Rural Development  
Administration, Republic of Korea

Contract grant number: PJ01334605

**Running Head:** Multi-omics characterization of CHO parental cell lines

26 **Abstract**

27 Chinese hamster ovary (CHO) cells are the most prevalent mammalian cell factories for producing  
28 recombinant therapeutic proteins due to their ability to synthesize human-like post-translational  
29 modifications and ease of maintenance in suspension cultures. Currently, a wide variety of CHO  
30 host cell lines have been developed; substantial differences exist in their phenotypes even when  
31 transfected with the same target vector. However, relatively less is known about the influence of  
32 their inherited genetic heterogeneity on phenotypic traits and production potential from the  
33 bioprocessing point of view. Herein, we present a global transcriptome and proteome profiling of  
34 three commonly used parental cell lines (CHO-K1, CHO-DXB11 and CHO-DG44) in suspension  
35 cultures and further report their growth-related characteristics, and N- and O-glycosylation  
36 patterns of host cell proteins (HCPs). The comparative multi-omics analysis indicated that some  
37 physiological variations of CHO cells grown in the same media are possibly originated from the  
38 genetic deficits, particularly in the cell cycle progression. Moreover, the dihydrofolate reductase  
39 deficient DG44 and DXB11 possess relatively less active metabolism when compared to K1 cells.  
40 The protein processing abilities and the N- and O-glycosylation profiles also differ significantly  
41 across the host cell lines, suggesting the need to select host cells in a rational manner for the cell  
42 line development on the basis of recombinant protein being produced.

43

44 **Keywords:** multi-omics analysis, mammalian systems biotechnology, critical quality attributes,  
45 N-glycosylation, CHO parental cell lines,

## 46 1 INTRODUCTION

47 Mammalian expression systems are the preferred choice for the industrial production of  
48 recombinant glycoprotein therapeutics due to their humanized post-translational modifications, i.e.  
49 N-glycosylation and appropriate protein folding, and the ability to secrete the product naturally  
50 outside of the cell (Wurm, 2004). Among several mammalian host cells, Chinese hamster ovary  
51 (CHO) cells are commonly used since they can grow in suspension culture with chemically defined  
52 media, and are highly resistant to viral susceptibility. Overall, 84% of the biopharmaceutical drugs  
53 are currently produced using CHO cells (Walsh, 2018).

54 Generally, bioprocess development includes two major stages: 1) establishment of efficient  
55 cell lines producing target proteins, and 2) development of optimal cell culture media and/or  
56 process conditions (Hong et al., 2018). Currently, a multitude of CHO cells with various genetic  
57 backgrounds have been utilized since the first approval of a drug produced in CHO cells in 1984  
58 (Kaufman et al., 1985). Of them, the CHO-K1, -DXB11 and -DG44 are the most relevant parental  
59 cell lines to manufacture target products industrially (Golabgir et al., 2016). Historically, the  
60 proline-deficient K1 cells was established in 1968 (Kao and Puck, 1968), about 10 years after its  
61 first isolation from the Chinese hamster ovaries. Later, the DXB11 was generated by mutagenesis  
62 targeting the dihydrofolate reductase gene (*Dhfr*) from K1 cells, resulting in missense mutation in  
63 one allele and complete deletion in the other (Urlaub and Chasin, 1980; **Figure 1a**). Note that the  
64 *Dhfr* gene is responsible for reducing folate, which is an essential step in nucleotide biosynthesis.  
65 Even though both alleles of the *Dhfr* gene were modified in the -DXB11 cells, it still presented  
66 some minor activity of the gene. Thus, the deletion of both alleles of this gene led to the generation  
67 of the -DG44 cell line in the mid-1980s (Urlaub et al., 1983). Here, it should be noticed that DG44  
68 was not derived from the K1 cell line, but from the very first isolated CHO cell lines (**Figure 1a**).

69 Interestingly, although these cell lines are derived from a common ancestor, extensive mutagenesis  
70 and the clonal diversification has resulted in considerable genetic heterogeneity as revealed by  
71 their genome sequences (Kaas et al., 2015; Lewis et al., 2013; Xu et al., 2011). Significant  
72 differences in the gene copy numbers, single nucleotide polymorphisms, structural variants and  
73 chromosomal rearrangements were observed.

74 Due to the presence of such “quasispecies” within the CHO parental cell lines (Wurm,  
75 2013), there exist considerable dissimilarities in their phenotypes and possibly even variations in  
76 the critical quality attributes, e.g. N- and O-glycosylation profiles, of the recombinant proteins  
77 produced from them. For example, when the same antibody was produced from different CHO  
78 cells, the viable cell densities and final titer across several bioprocess conditions varied  
79 significantly, depending on the parental cell line used (Hu et al., 2013; Reinhart et al., 2018).  
80 Furthermore, there are appreciable variations among the N-glycosylation patterns and other quality  
81 attributes of the recombinant proteins produced (Könitzer et al., 2015; Reinhart et al., 2018).  
82 Therefore, it is highly required to understand the diversity in the phenotypes of CHO cells and  
83 associate it with known genetic heterogeneity for the rational selection of suitable parental cells.  
84 Moreover, the characterization of N- and O-glycosylation preferences of various CHO host cells  
85 is a critical aspect within the “Quality by Design (QbD)” framework (Butler and Spearman, 2014).

86 Towards the goal of unraveling the heterogeneity of the various CHO parental cell lines  
87 and linking it with their genetic diversity, here we have accomplished an integrative multi-omics  
88 analysis, at the transcriptomic, proteomic and glycomic levels, of the K1, DG44 and DXB11 cells  
89 during the exponential growth phase in suspension cultures. To our knowledge, although a recent  
90 study reported proteomics analysis to compare the differential protein expression in CHO-K1, -S  
91 and *Dhfr*<sup>-</sup> cell lines (Xu et al., 2017), the current work provides more comprehensive multi-omics

92 analysis for various CHO host cells, thus serving as a basis to further rationalize cell line  
93 development and engineering.

94

## 95 **2 MATERIALS AND METHODS**

### 96 **2.1 Cell lines, cultivation and characterization**

97 CHO-K1 (ATCC No. CCL-61, American Type Culture Collection, USA), CHO-DXB11 (ATCC  
98 No. CRL-9096, American Type Culture Collection) and CHO-DG44 (Gibco™ catalog number  
99 12609-012, Invitrogen, USA) previously adapted to serum free suspension culture were  
100 propagated in a DMEM/F12-based protein free chemically defined medium (PFCDM)  
101 supplemented with Soybean peptone (Catalog number P0521, Sigma-Aldrich, USA) and HT  
102 supplement (Gibco™ catalog number 11067-030, ThermoFisher Scientific, USA). To compare cell  
103 growth over 6 days, all three cell lines were cultivated in batch mode by seeding  $2 \times 10^5$  cells/mL  
104 into orbitally agitated disposable Erlenmeyer flasks (Corning, USA) in duplicates. Replicate shake  
105 flasks were cultivated similarly and harvested at Day 2 for the various –omics analyses. Cell  
106 density and viability were measured daily by the trypan blue dye exclusion method using Vi-Cell  
107 XR (Beckman Coulter, USA). Glucose, lactate, ammonium, glutamine and glutamate  
108 concentrations in the culture supernatant were measured daily using BioProfile 100 Plus (Nova  
109 Biomedical, USA).

110

### 111 **2.2 Analysis of extracellular nutrients/metabolites**

112 Glucose, lactate, glutamine and glutamate concentrations in the culture supernatant were measured  
113 using a 2700 Biochemistry Analyser (Yellow Springs Instruments, USA). Ammonia concentration  
114 was measured using a commercial kit (Sigma, USA).

## 115 **2.3 Transcriptome profiling and data processing**

116 Cell pellets ( $1 \times 10^7$  cells) were collected from three replicate flasks for each of the cell lines. Total  
117 RNA was isolated using RNeasy Mini Kit (Qiagen, Germany). RNA quality and integrity were  
118 verified using a NanoDrop 2000 spectrophotometer (Thermo Fisher Scientific) and Agilent  
119 Bioanalyzer 2100 (Agilent Technologies, USA). cDNA targets were generated from 250 ng total  
120 RNA using the GeneChip 3' IVT PLUS Reagent Kit (Thermo Fisher Scientific). The targets were  
121 then hybridized onto a proprietary CHO 3' IVT microarray (CHO V3) consisting of 43,856 probe  
122 sets that correspond to 13,358 mouse genes based on CHO EST Sequence and Annotation Release  
123 06 (Affymetrix, Singapore). Quality assessment and data analysis were carried out on the CEL  
124 files obtained, using Partek Genomics Suite version 6.6 (Partek Inc., USA).

125

## 126 **2.4 Proteome profiling and data processing**

127  $1 \times 10^7$  cells were collected for each experimental condition in set of biological triplicates. Cells  
128 were washed twice in  $1 \times$  PBS and lysed in 8 M urea supplemented with  $1 \times$  Halt Protease Inhibitor  
129 Cocktail (Thermo Fisher Scientific, USA). Insoluble cellular material was removed by  
130 centrifugation at  $18,000 \times g$  for 20 min at  $4^\circ\text{C}$ , and protein concentration in each sample was  
131 determined by Bradford assay using Pierce<sup>TM</sup> Coomassie Plus Assay Reagent (Thermo Fisher  
132 Scientific). Subsequently, 100  $\mu\text{g}$  of protein from each sample was digested with trypsin and  
133 labelled with TMTsixplex<sup>TM</sup> Isobaric Mass Tagging Kit (Thermo Fisher Scientific) according to  
134 manufacturer's instructions. Labelled peptides from each set of replicates were then combined and  
135 cleaned up using SCX cartridge system (Applied Biosystems, USA) prior to 2D-LC-MS analysis.

136 First dimension LC separation consisted of high pH reverse-phase fractionation at a flow  
137 rate of 1 ml/min from a gradient of 3.5-54% acetonitrile in 20 mM ammonium formate, pH 9.6

138 over 30 min on an XBridge BEH C18 column, 130Å, 3.5 µm, 3 mm × 150 mm (Waters, USA) in  
139 an Ultimate 3000 UHPLC system (Thermo Fisher Scientific), with a total of 10 pooled peptide  
140 fractions from each triplicate set collected. Second dimension separation was carried out by  
141 analyzing 3 µg of each sample by nanoLC-MS/MS at a flow rate 300 nl/min 2-50% acetonitrile in  
142 0.1 % formic acid over 100 min on an ACQUITY UPLC Peptide BEH C18 column, 130Å, 1.7 µm,  
143 75 µm × 200 mm (Waters) in a nanoACQUITY UPLC system (Waters, USA) coupled to an LTQ-  
144 Orbitrap Velos mass spectrometer (Thermo Fisher Scientific). The LTQ-Pribtirap Velos was  
145 operated in data-dependent mode with full mass scan acquired for mass range of 400-1,400 m/z.  
146 The top 10 most intense peaks with charged state ≥ +2 were fragmented by HCD with normalized  
147 collision energy of 45%, minimum signal threshold of 500, isolation width of 2 Da and activation  
148 time of 0.1 ms.

149 Raw MS data was analyzed by Sequest HT and MS Amanda search engines against NCBI  
150 CHO refseq database using Proteome Discoverer v. 2.0 (Thermo Fisher Scientific). Precursor mass  
151 range of 350-5,000 Da was used, with MS1 tolerance of 10 ppm and MS2 tolerance of 0.02 Da,  
152 static modifications of carbamidomethylation on cysteine and TMTsixplex label on lysine,  
153 dynamic modifications of oxidation on methionine, TMTsixplex on peptide N-terminus and  
154 acetylation on protein N-terminus, and PSM validation by percolator node. Quantification was  
155 performed without replacement of missing value and without application of isotope correction  
156 factors. Co-isolation threshold was set at 50% with peptide abundance for each channel normalized  
157 by total peptide amount and scaled on channels average.

158

## 159 **2.5 Metabolome profiling and data processing**

160  $1 \times 10^7$  cells were collected from each experimental condition and quenched in 5 volumes of ice-

161 cold 150 mM sodium chloride (Sigma-Aldrich) solution. Subsequently, the quenched cell pellet  
162 was processed using a two-phase liquid extraction protocol involving methanol, tricine solution  
163 and chloroform as previously described (Yusufi et al., 2017). Polar metabolite extracts were stored  
164 at -80°C. Prior to analysis, the extracts were dried and reconstituted in cold methanol and water  
165 (5:95 v/v).

166 Untargeted LC-MS analysis of the polar metabolites was then performed using an ultra-  
167 high performance liquid chromatography (UPLC) system (Acquity; Waters, USA) coupled to a  
168 mass spectrometer (QExactive MS; Thermo Scientific, USA). A reversed phase (C18) UPLC  
169 column with polar end-capping (Acquity UPLC HSS T3 column, 2.1mm, 100 mm, 1.8 mm; Waters)  
170 was used with two solvents: 'A' being water with 0.1% formic acid (Fluka, Sigma-Aldrich, USA),  
171 and 'B' being methanol (Optima grade, Thermo Fisher Scientific, USA) with 0.1% formic acid.  
172 The LC program was as follows: the column was first equilibrated for 0.5 min at 0.1% B. The  
173 gradient was then increased from 0.1% B to 50% B over 8 min before being held at 98% B for 3  
174 min. The column was washed for a further 3 min with 98% acetonitrile (Optima grade, Fisher  
175 Scientific) with 0.1% formic acid and finally equilibrated with 0.1% B for 1.5 min. The solvent  
176 flow rate was set at 400 mL/min; a column temperature of 30°C was used. The eluent from the  
177 UPLC system was directed into the MS. High-resolution mass spectrometry was then performed  
178 in both positive and negative electrospray ionization (ESI) modes, with a mass range of 70 to 1,050  
179 m/z and a resolution of 70,000. Sheath and auxiliary gas flow was set at 30.0 and 20.0 (arbitrary  
180 units) respectively, with a capillary temperature of 400°C. The spray voltages were 1.25 kV for  
181 positive and 1.5 kV negative mode ionization. Mass calibration was performed using standard  
182 calibration solution (Thermo Scientific) prior to injection of the samples. A quality control (QC)  
183 sample comprising of equal aliquots of each sample was run at regular intervals during the batch



184 LC-MS runs.

185       The raw LC-MS data obtained was pre-processed based on the XCMS peak finding  
186 algorithm (Smith et al., 2006) and the QC samples were used to adjust for instrumental drift. Total  
187 area normalization was then applied to the pre-processed data prior to statistical analysis using  
188 multivariate (SIMCA-P+ software, version 13.0.3, Umetrics, Sweden) and univariate tools,  
189 including relative ratios, student's t-test (Welch's correction) and hierarchical clustering for the  
190 classification of common trends. Metabolite identities were confirmed by MS-MS spectral  
191 comparison with commercially available metabolite standards or with available mass spectral  
192 libraries (Wishart et al., 2018).

193

## 194 **2.6 N- and O-glycome profiling**

195 Glycomics analysis of CHO cells was performed according to a previous study by North et al.,  
196 (2010) with slight modifications. Briefly, N-glycans were released by PNGase F (Prozyme, USA)  
197 from post nuclear fraction of CHO cell lysate which had been subjected to reduction, S-  
198 carboxymethylation, and tryptic digestion. O-glycans were released by sodium borohydride-  
199 mediated beta-elimination, from de-N-glycosylated peptides. Both N- and O-glycan samples were  
200 permethylated and purified by C18 solid phase extraction. N-glycan samples were analyzed by  
201 5800 TOF/TOF mass spectrometer (AB SCIEX, USA) and O-glycans were analyzed by 5500 Q-  
202 TOF system online coupled downstream to a nano-LC system with an integrated chip-based nano  
203 C18 column (both from Agilent Technologies, USA). Deconvoluted mass spectra were analyzed  
204 for data obtained from both MALDI and QTOF systems. Neutral masses were extracted and parsed  
205 against theoretical N- and O-glycan mass libraries (permethylated for N-glycans, reduced and  
206 permethylated for O-glycans) for CHO cells. Putative N- and O-glycan structures were assigned

207 based on the knowledge of glycan biosynthetic pathway in CHO cells (North et al., 2010).

208

## 209 **2.7 Identification of differentially expressed genes in the transcripts and proteins**

210 Using the normalized gene expression data, the differentially expressed genes was identified with  
211 CHO-K1 as the reference using empirical Bayes-moderated t-statistics via “limma” package in R  
212 (Wettenhall and Smyth, 2004). Genes showing  $\geq \pm 1.5$  fold difference with a FDR-adjusted p-  
213 values  $\leq 0.01$  were classified as differentially expressed.

214 Quantifiable proteins were identified at 1% FDR with  $\geq 2$  unique peptides and had  
215 abundance values reported for at least two of the triplicate samples; any missing protein abundance  
216 value was replaced by the average abundance values reported for the other two of the triplicate  
217 samples where applicable. Proteins showing  $\geq \pm 1.5$  fold difference with a FDR-adjusted p-values  
218  $\leq 0.1$  were classified as differentially expressed.

219

## 220 **2.8 Metabolic pathway enrichment analysis of differentially expressed transcripts and** 221 **proteins**

222 Enrichment analysis of the metabolic genes was performed using omics data in conjunction with  
223 the CHO genome-scale metabolic network (Hefzi et al., 2016). The gene-protein-reaction (GPR)  
224 associations in the metabolic network and the reaction pathway classifications were used to assign  
225 the metabolic genes to different reaction pathways. To identify enriched metabolic pathways, the  
226 differentially expressed genes are first identified based on the p-value ( $< 0.01$ ; FDR-corrected) and  
227 fold change ( $> 1.5$ ). The enrichment of differentially regulated genes in each pathway was then  
228 computed using the hypergeometric distribution as follows:

229

$$p_x = \frac{\binom{K}{k} \binom{N-K}{n-k}}{\binom{N}{n}}$$

230 where  $N$  is the total number of genes in CHO cells,  $K$  is the total number of up/downregulated  
231 genes,  $n$  is the total number of genes in pathway “x” and  $k$  is the number of up/downregulated  
232 genes in pathway “x”. The pathway with lowest  $p$ -value is classified as highly enriched in  
233 differentially expressed genes.

234

## 235 **2.9 Estimation of gene copy number variations (CNV) between CHO cell lines**

236 The changes in absolute gene copy numbers between the CHO cell lines were calculated using  
237 CHO-K1 as the reference from the normalized sequencing read depth of individual cell lines which  
238 was reported previously (Kaas et al., 2015). A gene is considered to be deleted in a cell line if the  
239 read depth is zero in that particular cell line but  $>0.95$  in CHO-K1. Gene amplifications and  
240 reductions were also calculated in a similar manner.

241

## 242 **3 RESULTS**

### 243 **3.1 CHO-K1 grows faster in suspension batch cultures than DG44 and DXB11**

244 The three CHO parental cell lines, i.e. K1, DG44 and DXB11, were propagated in duplicates in  
245 the same DMEM/F12-based protein free chemically defined medium (PFCDM) supplemented  
246 with Soybean peptone and HT supplement, in order to reduce variability due to differences in cell  
247 culture media. These cell culture experiments clearly showed that the K1 cells grew much faster  
248 when compared to the other two cell lines, reaching the maximum cell densities first (**Figure 1b**).  
249 The doubling time of K1 cells is  $20 \pm 1$  hr whereas DG44 and DXB11 correspond to  $30 \pm 0.3$  and

250 32±4, respectively. Notably, these results were highly consistent with an earlier study which  
251 reported that the maximum viable cell densities achieved in batch culture following the order of  
252 K1>>DG44>DXB11 (Sommeregger et al., 2013). While the cells were grown in commercial  
253 media in the earlier study, the concordance between the two results highlight that the slow growth  
254 of *Dhfr*<sup>-</sup> cells is mainly because of the genetic divergence. Here, it should be highlighted that  
255 although all the three media contained HT, the purine supplements enabling the cells to overcome  
256 deprivation of nucleoside precursors as a result of the *Dhfr* deficiency, we still observed much  
257 lower growth rates than K1. This confirms that the loss of *Dhfr* gene activity could not be simply  
258 compensated by supplementing HT as there could be additional pathways contributing to such  
259 growth differences (Florin et al., 2011). In order to further investigate metabolic traits of CHO host  
260 cells, we also profiled the major nutrients and byproducts in the cell culture. Glucose was rapidly  
261 consumed in the K1 compared to others (**Figure 1c**). Similarly, a sharper decrease in the glutamine  
262 concentrations was also observed in K1 cell cultures with a concomitant higher accumulation of  
263 ammonia and lactate than DXB11 and DG44 cell cultures (**Figure 1d**), possibly indicating that K1  
264 cells undergo higher carbon and nitrogen catabolism.

265

### 266 **3.2 Global transcriptome and proteome profiling of CHO parental cell lines confirms Known** 267 **genetic heterogeneity**

268 To systematically analyze the underlying molecular mechanisms leading to the observed growth  
269 phenotypes across CHO host cells, samples were harvested during the exponential phase for  
270 transcriptome and proteome profiling. Transcriptomics analysis was performed using a proprietary  
271 microarray encompassing CHO probe sets that correspond to 13,358 unique mouse genes  
272 (**Supplementary file**). As expected, the expression of *Dhfr* gene in K1 was more than twice the

273 intensity of DXB11 while a very low detectable signal was present in DG44, possibly due to noise,  
274 thus confirming the known genetic backgrounds of CHO cells. MS-based proteomic profiling  
275 using multiplexed isobaric tags (iTRAQ) identified and detected a total of 1998 unique proteins  
276 corresponding to 1983 genes in more than one biological replicate (**Supplementary file**). Note  
277 that 1857 of these 1983 genes were also present in the microarray, thus providing relevant  
278 information at both the transcript and protein levels (**Figure 2a**). After transcriptome and proteome  
279 profiling, we initially analyzed the global mRNA and protein expression patterns via two different  
280 methods: 1) principal component analysis (PCA) and 2) hierarchical clustering of Pearson  
281 correlation coefficients. PCA revealed that the expression patterns of all the cell lines were  
282 markedly different at both transcript and protein levels (**Figure 2b and 2c**), highlighting that the  
283 genetic divergence of the CHO parental cell lines indeed influences the phenotype via  
284 transcriptional and translational regulations. The hierarchical clustering of transcriptome and  
285 proteome also showed similar trends, where the global expression patterns of K1 are closer to  
286 DXB11 than DG44 cells at both transcript and protein levels (**Figure 2d and 2e**), recapitulating  
287 the known genetic divergence of the CHO parental cell lines (**Figure 1a**).

288

### 289 **3.3 Integrative transcriptome and proteome analysis highlights that cellular metabolism and** 290 **cell cycle progression are negatively regulated in *Dhfr*-deficient cells**

291 To pinpoint relevant cellular functions attaining the observed phenotypic differences based on the  
292 transcriptomic and proteomic features, we first identified the differentially expressed genes at both  
293 levels using K1 as a reference. In the K1 vs DXB11 comparisons, we identified 2231 mRNAs and  
294 239 proteins to be differentially expressed, with a large fraction being down-regulated in DXB11  
295 (**Supplementary file**). A total of 2875 mRNAs and 304 proteins were also differentially expressed

296 in K1 vs DG44 comparisons where some are down-regulated in DG44. Together, the larger fraction  
297 of up-regulated compared to down-regulated genes in K1 suggests more active transcription and  
298 translation compared to DG44 and DXB11. Subsequent gene ontology-based enrichment analysis  
299 of the differentially expressed transcripts and proteins revealed that the cellular metabolic process  
300 including lipid and energy metabolism, DNA, RNA and protein metabolic processes, cell cycle,  
301 growth, and cell proliferation and death present the major expression differences among the three  
302 cell lines (**Figure 3a**). Particularly, both DG44 and DXB11 presented a negative regulation of cell  
303 cycle progression, DNA replication and the biosynthesis of nucleotides. Several genes which  
304 commit the cells in cell cycle from G2 phase to M phase and the next mitotic phase were all down-  
305 regulated in DG44 and DXB11. Further, the down-regulation of cyclins including *Ccny*, *Ccnl2*,  
306 *Ccnc* and *Ccnh*, and serine/Threonine Kinase, *Akt1*, indicates that the cell cycle progression and  
307 DNA replication are negatively regulated by PI3K-Akt and MAPK signaling pathways (Duronio  
308 and Xiong, 2013; Rhind and Russell, 2012). In addition to the cell cycle and cellular organization  
309 related genes, we also found that the purine nucleotide metabolic processes (as expected, due to  
310 the *Dhfr* gene copy number differences) and sterol metabolic process to be significantly enriched  
311 in the differentially expressed genes. Remarkably, the expression patterns of glycosylated protein  
312 processing processes such as N-glycosylation, Golgi organization, vesicle-mediated protein  
313 transport and protein folding were also significantly altered across cell lines.

314 We next overlaid the transcriptomic and proteomic expression patterns to compare their  
315 concordance in each comparison (**Figure 3b**). A set of 55 proteins commonly downregulated in  
316 DG44 and DXB11 at both levels were identified, including *Pacsin2* and *Ezr*, both of which are  
317 substrates of protein kinases associated with the regulation of actin cytoskeleton dynamics  
318 (D'Angelo et al., 2007; Goh et al., 2012; de Kreuk et al., 2011), altering the cellular structure as

319 well as cell migration and macromolecular assembly. The current analysis also identified 110 and  
320 113 up- and down-regulated proteins in DXB11 vs K1 and DG44 vs K1 comparisons, respectively,  
321 which do not show any expression differences in their corresponding mRNAs (Supplementary file).  
322 Their gene enrichment analysis allowed us to understand that central metabolic pathways,  
323 particularly energy metabolism including the ATP biosynthesis (e.g., *Atp5j*, *Atp5o* and *Atpif1*) via  
324 cellular respiration and ROS detoxifying glutathione metabolism, are post-transcriptionally  
325 regulated. In addition, some of the genes from nucleotide metabolism and glycosyl compound  
326 biosynthetic pathways were also potentially post-transcriptionally regulated. Such examples  
327 include *Ada*, *Neu2*, *Galnt2* and *Rrm2*.

328         The fold-changes of 1857 proteins that are detected at both protein and transcript levels  
329 showed a moderate correlation with corresponding transcript fold-changes in both DXB11 vs K1  
330 (Spearman's  $r = 0.6017$ ; Pearson's  $r = 0.5949$ ; **Figure 3c**) and DG44 vs K1 (Spearman's  $r = 0.7524$ ;  
331 Pearson's  $r = 0.7425$ ; **Figure 3d**). Previously, several studies have reported similar correlations  
332 (moderate or poor) which are attributable to possibly the changes in translation and transcription  
333 rates, protein and transcript degradation rates and other regulatory factors (Liu et al., 2016).  
334 However, despite the moderate correlation, we were able to identify a list of 109 genes from such  
335 comparisons as potential targets for cellular engineering in CHO cells since they showed a very  
336 good correlation in expression between transcript and protein levels ( $R^2 > 0.9$ ; **Supplementary**  
337 **file**).

338

### 339 **3.4 Hard-wired changes of gene expression in signaling and nucleotide metabolic pathways** 340 **are observed in DXB11 and DG44 cell lines**

341 In order to understand whether significant differences in the transcriptional and translational

342 patterns across the cell lines are caused by the genetic heterogeneity, we examined their gene copy  
343 number changes. Interestingly, this analysis showed that 9% of the total 2231 differentially  
344 expressed mRNAs have a hard wiring of copy number changes in the DXB11 genome when  
345 compared to K1 (**Supplementary file; Figure 3e**). 51 up-regulated genes have increased copy  
346 numbers including two serine/threonine-protein kinases (*Wnk2* and *Mknk2*) that are known to  
347 inhibit cell proliferation by negatively regulating the ERK pathway (Moniz et al., 2007); 154  
348 down-regulated genes showed a decrease in gene copy numbers, including homozygous deletion  
349 of two genes, *Tmem14a* and *Plgrkt*. Notably, *Tmem14a* is a transmembrane protein which inhibits  
350 apoptosis by negatively regulating the mitochondrial membrane permeabilization (Woo et al.,  
351 2011). Therefore, its complete deletion in DXB11 could possibly result in dysregulation of  
352 apoptosis inhibition pathway, contributing to the cell death. In addition, certain cell cycle  
353 associated genes such as *Cdk11b*, *Taf4* and *Dsccl* were also heterozygously deleted, presumably  
354 leading to the negative regulation of cell cycle progression as mentioned earlier.

355         When compared to DXB11 cells, even larger fraction of differentially expressed mRNAs  
356 (18%) are associated with the copy number changes in the DG44 genome (**Figure 3f**). Interestingly,  
357 DG44 cells showed homozygous deletion of 12 genes including the known removal of *Dhfr*. In  
358 addition, passenger deletion of neighboring genes (*Fam15b*, *Msh3* and *Zfyve16*) and other cell  
359 cycle related genes (e.g., *Cdk11b*, *Taf4* and *Dsccl*) were observed. Clearly, these results suggest  
360 that DG44 cell lines have the inherent limitation in cell cycle progression and nuclear division as  
361 reflected in the slow growth phenotype. Several up-regulated genes in DG44 also have  
362 corresponding augmentation in gene copy numbers where some genes were amplified up to 4 times.  
363 Such examples include vesicle-mediated transport regulating genes, *Axl* and *Synj2bp*, which are  
364 related to the vascular transport of proteins. The complete list of differentially expressed genes



365 with corresponding copy number differences are provided in Supplementary file.

366

### 367 **3.5 Dysregulation of nucleotide and sterol metabolism may lead to slow growth in *Dhfr*-** 368 **deficient cell lines**

369 Since majority of the differentially expressed genes were from cellular metabolism, we integrated  
370 the transcriptome and proteome data with the CHO genome-scale metabolic network (Hefzi et al.,  
371 2016) to unravel the transcriptional signatures of the CHO metabolism. The transcriptome and  
372 proteome data were mapped onto the metabolic network using the available gene-protein-reaction  
373 (GPR) rules. The microarray-acquired transcriptome data maps to 1287 of 1764 gene loci in the  
374 model while the MS-acquired proteome data is linked to 548 genes. Following the transcriptome  
375 and proteome data mapping, we assessed the enrichment of various metabolic pathways among  
376 the up-/down-regulated transcripts and proteins (see **Methods; Figure 4a**). As expected, the purine  
377 nucleotide metabolism is grossly dysregulated in both DG44 and DXB11 when compared to K1  
378 due to the absence of *Dhfr* gene. Particularly, adenylosuccinate lyase (*Adsl*), an enzyme which  
379 converts the succinylaminoimidazole carboxamide ribotide (SAICAR) into key AMP precursor,  
380 aminoimidazole carboxamide ribotide (AICAR), was downregulated by more than 3.5 times in  
381 both cell lines (**Figure 4b**). Similarly, nicotinamide nucleotide adenylyltransferase 2 (*Nmnat2*)  
382 which catalyzes an essential step in NAD biosynthetic pathway was also downregulated by more  
383 than 3 times in both cell lines. Apart from nucleotide metabolism, interestingly, several genes in  
384 the cholesterol biosynthesis including *Hmgcs1*, *Fdps*, *Idi2*, *Lss*, *Ebp* and *Hsd17b7* were up-  
385 regulated in DG44 and DXB11 (**Figure 4b**). Since endogenous cholesterol levels modulate the  
386 epidermal growth factor receptor (EGFR) signaling and control meiosis (Gabitova et al., 2014),  
387 elevated sterol levels in *Dhfr*-deficient cell lines could have a potential role in negatively regulating

388 cell cycle progression although it is unclear how exactly sterols control the cell cycle. ROS-  
389 detoxifying glutathione metabolism was observed to be upregulated, possibly suggesting that these  
390 cell lines have better ability for protein processing as an earlier study reported that higher levels of  
391 glutathione were found in high-producer when compared to low-producer CHO cells (Orellana et  
392 al., 2015).

393 To further examine whether such observed expression differences in the transcripts and  
394 proteins of metabolic pathways ultimately affect the endogenous metabolite levels, we performed  
395 LC-MS based metabolite profiling of DG44 and K1 cells. Noticeably, this analysis showed several  
396 metabolites in central metabolism, e.g., glyceraldehyde-3-phosphate and lactate, and energy  
397 generation (NAD and FAD), are much abundant in K1 (**Figure 4c**). On the other hand, the levels  
398 of metabolites that are associated with cellular stress and growth inhibition such as oxidized  
399 glutathione and CDP-choline were observed to be higher in DG44 (**Supplementary file**).

400

### 401 **3.6 N- and O-glycosylation of host cell proteins from parental CHO cell lines is discernably** 402 **different**

403 The considerable genetic heterogeneity of various parental CHO cells is also thought to influence  
404 the quality attributes such as N- and O-glycosylation, charge variants and sequence variants of the  
405 recombinant proteins produced from them. Therefore, in order to analyze the possible variations  
406 in quality attributes of the protein products, we profiled the N- and O-glycosylation of the host cell  
407 proteins. Corresponding glycomic analyses successfully detected 38 different N-glycan species  
408 which are usually processed in the ER, cis-Golgi, medial-Golgi and trans-Golgi compartments  
409 (See Methods). Comprehensive analyses of the resulting N-glycan species and their relative  
410 abundances revealed several interesting aspects. The initial processing in ER is not likely to be

411 different among the cell lines; the high mannose structures were found to be relatively similar.  
412 However, there exists an appreciable difference in downstream processing of N-glycans. The  
413 terminal GlcNAc containing hybrid structures processed at the cis-Golgi were slightly higher in  
414 DXB11 than other two cell lines while the complex tri-antennary structures which are processed  
415 in medial- and trans-Golgi were higher in DG44 and K1 (**Figure 5a**). Notably, K1 cells had much  
416 higher final capping of glycan species, i.e. sialylation, beyond which no further sugar moieties can  
417 be added. Apart from N-glycans, we also measured the relative abundances of O-glycans including  
418 three major structures, T antigen, sialyl-T antigen and diasialyl-T antigen. Further, the sialylated  
419 structures were found to be more abundant in K1 than the other two cell lines even in O-glycans  
420 (**Figure 5b**).

421 We subsequently correlated the variations in N-glycan species with the transcriptomic and  
422 proteomic data of the N-glycosylation associated pathways (**Figure 5c**). Although there was no  
423 appreciable difference in the expression of genes in early processing of N-glycans, one notable  
424 exception is that the family of N-acetylglucosaminyltransferase genes (*Mgat2*, *Mgat4b* and *Mgat5*)  
425 were up-regulated in DXB11. Consistent with this observation, the terminal GlcNAc structures  
426 were slightly abundant in DXB11. In addition, the high levels of terminal galactose structures were  
427 correlated well with the up-regulation of two beta-1,4-galactosyltransferase isoforms (*B4galt4* and  
428 *B4galt5*), the enzymes which add galactose to the GlcNAc structures, and the UDP-galactose  
429 transporter (*Slc35b1*). Similarly, four isoforms of beta-galactoside alpha-2,3-sialyltransferase  
430 (*St3gal1*, *St3gal2*, *St3gal5* and *St3gal6*) were all up-regulated in K1, supporting the high levels of  
431 CMP-sialic acid structures (**Figure 4c**).

432

## 433 **4 DISCUSSION**

434 Currently, 7 out of the top 10 drugs are industrially produced from CHO cells where various  
435 companies use different CHO host cell lines empirically based on their experience and regulatory  
436 track records. While it has been argued that the possible differences in the CHO host cells could  
437 present appreciable variations in therapeutic protein production which could be further  
438 complicated by the clonality, still the literature available on comparing various CHO hosts is  
439 relatively scarce. Therefore, in order to evaluate the phenotypic traits and bioprocessing potentials  
440 of CHO host cell lines and provide a basis for rational cell line selection, we compared the three  
441 most widely used CHO cell lines via multi-omics profiling for the first time ever in this study. As  
442 such, our analysis uncovered that the *Dhfr*<sup>-</sup> cell lines, i.e. DG44 and DXB11, grow much slowly  
443 due to the mutations in purine nucleotide biosynthesis pathways, which retarded the cell growth  
444 directly as well as indirectly by interfering with DNA replication and cell cycle progression.  
445 Interestingly, this study also showed that the passenger deletions in both *Dhfr*<sup>-</sup> cell lines have  
446 critical impact on cell cycle progression and growth factor signaling as the loss or gain of gene  
447 functions associated with these pathways reflected well at the transcriptomic and proteomic levels.  
448 Moreover, the N- and O-glycomic profiling of host cell proteins in all the three cell lines revealed  
449 notable differences in the resulting glycosylation, thus highlighting the need to select a relevant  
450 cell line for the target protein of interest based on the preferred glycosylation patterns.

451 Consistent to earlier reports (Florin et al., 2011; Sommeregger et al., 2013), our study  
452 confirmed the ability of K1 cells to grow faster than the DG44 and DXB11 under suspension  
453 cultures. The transcriptomic and proteomic profiling uncovered that this physiological difference  
454 could be a consequence of two scenarios: 1) the lack of *Dhfr* gene leading to severe limitation for  
455 nucleotide synthesis and/or 2) the negative regulation of cell cycle via multiple signaling pathways

456 including PI3K-Akt, MAPK and ERK pathways, and a possible pathway activated by endogenous  
457 sterol levels (Gabitova et al., 2014). In this sense, overexpression of the several down-regulated  
458 cyclins such as *Ccny*, *Ccnl2*, *Cenc* and *Ccnh*, and serine/threonine kinase, *Akt*, could be an  
459 interesting strategy for improving the cellular growth in *Dhfr*<sup>-</sup> cell lines as it has been shown  
460 earlier in several mammalian cells (Jaluria et al., 2007).

461 In addition to the inhibition of cell cycle progression, several genes associated with cellular  
462 macromolecular assembly and component biogenesis were down-regulated in both DG44 and  
463 DXB11. Here, it should be highlighted that such observations of varied cellular structure is in good  
464 agreement with earlier studies which reported the size of ER and mitochondrial mass in K1 is  
465 higher than that of DXB11 (Hu et al., 2013). From a bioprocessing point of view, a larger ER  
466 provides significant advantage for K1 cells as it could handle much more proteins for their proper  
467 folding and further processing than the other two cell lines. The limitations in the ER size could  
468 also be a possible reason for growth inhibition in *Dhfr*<sup>-</sup> cells; since the ER size is limited, as the  
469 unprocessed proteins accumulate, the unfolded protein response pathways could be activated,  
470 which in turn could trigger the ROS stress pathways, thus ultimately invoking the apoptosis  
471 pathway (Hu et al., 2013). The multi-omics data generated in this study supports this hypothesis  
472 at several levels: both transcriptome and proteome showed the up-/down-regulation of several  
473 apoptosis activators and inhibitors, respectively. Subsequent metabolome analyses confirmed the  
474 high levels of oxidized glutathione, a ROS stress marker, possibly highlighting the relevance of  
475 elevated ROS stress in DG44 than K1. However, whether all such pathways operate in tandem has  
476 to be confirmed with further experiments.

477 Our study pinpointed that the N- and O-glycosylation patterns of protein products could  
478 have cell line specific variation due to the inherent characteristics of CHO hosts. For example,

479 DXB11 have high amounts of less processed structures, particularly terminal GlcNAc glycans, and  
480 K1 show much more sialylated structures in both N- and O-glycosylation profiles, which is  
481 possibly attributed to high expression of relevant biosynthetic enzymes as well as high levels of  
482 precursor availability. Notably, these observations are consistent with an earlier study which  
483 compared the glycosylation profile of an antibody produced from DG44 and K1 cells and observed  
484 that K1 produced much higher sialylated structures (Reinhart et al., 2018). While we observed no  
485 gene copy number difference in the glycosylation biosynthetic pathway, all the cell lines have their  
486 own expression preferences in each step of the glycan processing as different isoforms were up-  
487 /down-regulated. Such variation in isoforms expression could possibly be a result of differences in  
488 SNPs (Lewis et al., 2013) or due to changes in epigenetic control which await experimental  
489 verification. Although the variations of glycosylation patterns can be modulated to a certain degree  
490 by modifying the media and feeding strategies, the selection of an appropriate host depending on  
491 the product of interest would nonetheless be relevant to achieve consistent quality. To this end, K1  
492 and DG44 are probably more suitable for producing erythropoietin (EPO) or interferon beta 1  
493 (IFNB1) as these molecules have complex tetra-/tri-antennary N-glycan species whereas DXB11  
494 could provide a minor advantage for producing monoclonal antibodies since they have higher  
495 terminal GlcNAc structures that are usually bi-antennary.

496 In summary, our work exploited the wealth of multi-omics technologies to systematically  
497 link the possible phenotypic differences across CHO host cell lines with their genotypes. It also  
498 clearly highlighted that the genetic heterogeneity of CHO cells indeed affects their growth  
499 phenotype as well as N- and O-glycosylation profiles which could impact the bioprocessing steps.  
500 Although the integration of transgene could further alter the genomic landscape of host cells  
501 compared here, particularly DG44 and DXB11 due to the additional selection step, we believe that

502 most results unraveled in this study should hold good since the transgene targets only fragile  
503 regions of the genome and importantly the glycosylation profiles remain unaltered (Yusufi et al.,  
504 2017). Therefore, the current study could well serve as a good starting point for the rational  
505 selection of relevant CHO host cells as well as to establish cell line engineering targets.

506

## 507 **Acknowledgements**

508 This work was supported by the Biomedical Research Council of A\*STAR (Agency for Science,  
509 Technology and Research), Singapore, and the Next- Generation BioGreen 21 Program (SSAC,  
510 No. PJ01334605), Rural Development Administration, Republic of Korea.

511

## 512 **Conflict of interest**

513 The authors declare that there are no conflicts of interest.

514

## 515 **References**

516 Butler M, Spearman M. 2014. The choice of mammalian cell host and possibilities for  
517 glycosylation engineering. *Curr. Opin. Biotechnol.* **30**:107–12.

518 D'Angelo R, Aresta S, Blangy A, Del Maestro L, Louvard D, Arpin M. 2007. Interaction of ezrin  
519 with the novel guanine nucleotide exchange factor PLEKHG6 promotes RhoG-dependent  
520 apical cytoskeleton rearrangements in epithelial cells. *Mol. Biol. Cell* **18**:4780–93.

521 Duronio RJ, Xiong Y. 2013. Signaling pathways that control cell proliferation. *Cold Spring Harb.*  
522 *Perspect. Biol.* **5**:a008904.

523 Florin L, Lipske C, Becker E, Kaufmann H. 2011. Supplementation of serum free media with HT  
524 is not sufficient to restore growth properties of DHFR<sup>-/-</sup> cells in fed-batch processes -

- 525 Implications for designing novel CHO-based expression platforms. *J. Biotechnol.* **152**:189–  
526 93.
- 527 Gabitova L, Gorin A, Astsaturov I. 2014. Molecular pathways: sterols and receptor signaling in  
528 cancer. *Clin. Cancer Res.* **20**:28–34.
- 529 Goh SL, Wang Q, Byrnes LJ, Sondermann H. 2012. Versatile Membrane Deformation Potential of  
530 Activated Pacsin. *PLoS One* **7**:e51628.
- 531 Golabgir A, Gutierrez JM, Hefzi H, Li S, Palsson BO, Herwig C, Lewis NE. 2016. Quantitative  
532 feature extraction from the Chinese hamster ovary bioprocess bibliome using a novel meta-  
533 analysis workflow. *Biotechnol. Adv.* **34**:621–33.
- 534 Hefzi H, Ang KS, Hanscho M, Bordbar A, Ruckerbauer D, Lakshmanan M, Orellana CA, Baycin-  
535 Hizal D, Huang Y, Ley D, Martinez VS, Kyriakopoulos S, Jimenez NE, Zielinski DC, Quek  
536 LE, Wulff T, Arnsdorf J, Li S, Lee JS, Paglia G, Loira N, Spahn PN, Pedersen LE, Gutierrez  
537 JM, King ZA, Lund AM, Nagarajan H, Thomas A, Abdel-Haleem AM, Zanghellini J,  
538 Kildegaard HF, Voldborg BG, Gerdtzen ZP, Betenbaugh MJ, Palsson BO, Andersen MR,  
539 Nielsen LK, Borth N, Lee DY, Lewis NE. 2016. A Consensus Genome-scale Reconstruction  
540 of Chinese Hamster Ovary Cell Metabolism. *Cell Syst.* **3**:434–43.e8.
- 541 Hong JK, Lakshmanan M, Lee D-Y. 2018. Towards next generation CHO cell line development  
542 and engineering by systems approaches. *Curr. Opin. Chem. Eng.* **22**:1–10.
- 543 Hu Z, Guo D, Yip SSM, Zhan D, Misaghi S, Joly JC, Snedecor BR, Shen AY. 2013. Chinese  
544 hamster ovary K1 host cell enables stable cell line development for antibody molecules which  
545 are difficult to express in DUXB11-derived dihydrofolate reductase deficient host cell.  
546 *Biotechnol. Prog.* **29**:980–85.
- 547 Jaluria P, Betenbaugh M, Konstantopoulos K, Shiloach J. 2007. Enhancement of cell proliferation



548 in various mammalian cell lines by gene insertion of a cyclin-dependent kinase homolog.  
549 *BMC Biotechnol.* **7**:71.

550 Kaas C, Kristensen C, Betenbaugh MJ, Andersen M. 2015. Sequencing the CHO DXB11 genome  
551 reveals regional variations in genomic stability and haploidy. *BMC Genomics* **16**:160.

552 Kao FT, Puck TT. 1968. Genetics of somatic mammalian cells, VII. Induction and isolation of  
553 nutritional mutants in Chinese hamster cells. *Proc Natl Acad Sci U S A* **60**:1275–81.

554 Kaufman RJ, Wasley LC, Spiliotes a J, Gossels SD, Latt S a, Larsen GR, Kay RM. 1985.  
555 Coamplification and coexpression of human tissue-type plasminogen activator and murine  
556 dihydrofolate reductase sequences in Chinese hamster ovary cells. *Mol. Cell. Biol.* **5**:1750–  
557 59.

558 Könitzer JD, Müller MM, Leparc G, Pauers M, Bechmann J, Schulz P, Schaub J, Enenkel B,  
559 Hildebrandt T, Hampel M, Tolstrup AB. 2015. A global RNA-seq-driven analysis of CHO  
560 host and production cell lines reveals distinct differential expression patterns of genes  
561 contributing to recombinant antibody glycosylation. *Biotechnol. J.* **10**:1412–23.

562 de Kreuk B-J, Nethe M, Fernandez-Borja M, Anthony EC, Hensbergen PJ, Deelder AM, Plomann  
563 M, Hordijk PL. 2011. The F-BAR domain protein PACSIN2 associates with Rac1 and  
564 regulates cell spreading and migration. *J. Cell Sci.* **124**:2375–88.

565 Lewis NE, Liu X, Li Y, Nagarajan H, Yerganian G, O’Brien E, Bordbar A, Roth AM, Rosenbloom  
566 J, Bian C, Xie M, Chen W, Li N, Baycin-Hizal D, Latif H, Forster J, Betenbaugh MJ, Famili  
567 I, Xu X, Wang J, Palsson BO. 2013. Genomic landscapes of Chinese hamster ovary cell lines  
568 as revealed by the *Cricetulus griseus* draft genome. *Nat. Biotechnol.* **31**:759–67.

569 Liu Y, Beyer A, Aebersold R. 2016. On the Dependency of Cellular Protein Levels on mRNA  
570 Abundance. *Cell.* **165**(3):535-50

- 571 Moniz S, Verissimo F, Matos P, Brazão R, Silva E, Kotevelets L, Chastre E, Gespach C, Jordan P.  
572 2007. Protein kinase WNK2 inhibits cell proliferation by negatively modulating the activation  
573 of MEK1/ERK1/2. *Oncogene* **26**:6071–81.
- 574 North SJ, Huang H-H, Sundaram S, Jang-Lee J, Etienne AT, Trollope A, Chalabi S, Dell A, Stanley  
575 P, Haslam SM. 2010. Glycomics profiling of Chinese hamster ovary cell glycosylation  
576 mutants reveals N-glycans of a novel size and complexity. *J. Biol. Chem.* **285**:5759–75.
- 577 Orellana CA, Marcellin E, Schulz BL, Nouwens AS, Gray PP, Nielsen LK. 2015. High-antibody-  
578 producing Chinese hamster ovary cells up-regulate intracellular protein transport and  
579 glutathione synthesis. *J. Proteome Res.* **14**:609–18.
- 580 Reinhart D, Damjanovic L, Kaisermayer C, Sommeregger W, Gili A, Gasselhuber B, Castan A,  
581 Mayrhofer P, Grünwald-Gruber C, Kunert R. 2018. Bioprocessing of recombinant CHO-K1,  
582 CHO-DG44 and CHO-S: CHO expression hosts favor either mAb production or biomass  
583 synthesis. *Biotechnol. J.* **1700686**:1700686.
- 584 Rhind N, Russell P. 2012. Signaling pathways that regulate cell division. *Cold Spring Harb.*  
585 *Perspect. Biol.* **4(10)**:pii: a005942.
- 586 Smith CA, Want EJ, O’Maille G, Abagyan R, Siuzdak G. 2006. XCMS: processing mass  
587 spectrometry data for metabolite profiling using nonlinear peak alignment, matching, and  
588 identification. *Anal. Chem.* **78**:779–87.
- 589 Sommeregger W, Gili A, Sterovsky T, Casanova E, Kunert R. 2013. Powerful expression in  
590 Chinese Hamster Ovary cells using bacterial artificial chromosomes: parameters influencing  
591 productivity. *BMC Proc.* **7(Suppl 6)**:P25.
- 592 Urlaub G, Chasin LA. 1980. Isolation of Chinese hamster cell mutants deficient in dihydrofolate  
593 reductase activity. *Proc Natl Acad Sci U S A* **77**:4216–20.

- 594 Urlaub G, Käs E, Carothers AM, Chasin LA. 1983. Deletion of the diploid dihydrofolate reductase  
595 locus from cultured mammalian cells. *Cell* **33**:405–12.
- 596 Walsh G. 2018. Biopharmaceutical benchmarks 2018. *Nat. Biotechnol.* **36**:1136–45.
- 597 Wettenhall JM, Smyth GK. 2004. limmaGUI: a graphical user interface for linear modeling of  
598 microarray data. *Bioinformatics* **20**:3705–6.
- 599 Wishart DS, Feunang YD, Marcu A, Guo AC, Liang K, Vázquez-Fresno R, Sajed T, Johnson D,  
600 Li C, Karu N, Sayeeda Z, Lo E, Assempour N, Berjanskii M, Singhal S, Arndt D, Liang Y,  
601 Badran H, Grant J, Serra-Cayuela A, Liu Y, Mandal R, Neveu V, Pon A, Knox C, Wilson M,  
602 Manach C, Scalbert A. 2018. HMDB 4.0: The human metabolome database for 2018. *Nucleic  
603 Acids Res.* **46(D1)**:D608–D617.
- 604 Woo IS, Jin H, Kang ES, Kim HJ, Lee JH, Chang KC, Park JY, Choi WS, Seo HG. 2011.  
605 TMEM14A inhibits N-(4-hydroxyphenyl)retinamide-induced apoptosis through the  
606 stabilization of mitochondrial membrane potential. *Cancer Lett.* **309**:190–8.
- 607 Wurm F. 2013. CHO Quasispecies—Implications for Manufacturing Processes. *Processes* **1**:296–  
608 311.
- 609 Wurm FM, Hacker D. 2011. First CHO genome. *Nat. Biotechnol.* **29**:718–720.
- 610 Wurm FM. 2004. Production of recombinant protein therapeutics in cultivated mammalian cells.  
611 *Nat. Biotechnol.* **22**:1393–8.
- 612 Xu N, Ma C, Ou J, Sun WW, Zhou L, Hu H, Liu XM. 2017. Comparative Proteomic Analysis of  
613 Three Chinese Hamster Ovary (CHO) Host Cells. *Biochem Eng J* **124**:122–9.
- 614 Xu X, Nagarajan H, Lewis NE, Pan S, Cai Z, Liu X, Chen W, Xie M, Wang W, Hammond S,  
615 Andersen MR, Neff N, Passarelli B, Koh W, Fan HC, Wang J, Gui Y, Lee KH, Betenbaugh  
616 MJ, Quake SR, Famili I, Palsson BO. 2011. The genomic sequence of the Chinese hamster

617 ovary (CHO)-K1 cell line. *Nat. Biotechnol.* **29**:735–41.

618 Yusufi FNK, Lakshmanan M, Ho YS, Loo BLW, Ariyaratne P, Yang Y, Ng SK, Tan TRM, Yeo HC,  
619 Lim HL, Ng SW, Hiu AP, Chow CP, Wan C, Chen S, Teo G, Song G, Chin JX, Ruan X, Sung  
620 KWK, Hu WS, Yap MGS, Bardor M, Nagarajan N, Lee DY. 2017. Mammalian Systems  
621 Biotechnology Reveals Global Cellular Adaptations in a Recombinant CHO Cell Line. *Cell*  
622 *Syst.* **4**:530–42.e6.

623

624

## 625 **Figure Legends**

626 **Figure 1. Genetic and phenotypic differences of CHO parental cell lines.** a) The known genetic  
627 background of the three CHO cell lines studied, i.e. CHO-K1, DG44 and DXB11 (figure re-drawn  
628 based on Wurm and Hacker, 2011), b) viable cell densities and % viabilities of three parental cell  
629 lines grown in suspension cultures, c) residual concentrations of glucose and lactate, and d)  
630 concentration of glutamine and ammonia in the three cell cultures. The black, blue and red lines in  
631 each graph represent the CHO-K1, DG44 and DXB11 cell lines, respectively.

632  
633 **Figure 2. Global mRNA and protein expression patterns of CHO parental cell lines.** a) Global  
634 coverage of transcriptome and proteome data, b) PCA of the transcriptome, c) PCA of the proteome,  
635 d) hierarchical clustering of transcriptome and e) hierarchical clustering of proteome. Clustering  
636 was based on Euclidean distance of Pearson correlation coefficients.

637  
638 **Figure 3. Differential expression signatures of CHO parental cell lines.** a) GO enrichment  
639 analysis of differentially expressed genes at both transcript and protein level , b) number of  
640 differentially expressed genes at transcript and protein level in DXB11 and DG44 w.r.t. K1, c)  
641 correlation between transcript and protein expression ratios in DXB11 vs K1, d) correlation  
642 between transcript and protein expression ratios in DG44 vs K1, e) the effect of genomic variations  
643 in differentially expressed genes at the transcript level in DXB11 vs K1 comparison and f) the  
644 effect of genomic variations in differentially expressed genes at the transcript level in DG44 vs K1  
645 comparison.

646  
647 **Figure 4. Differential expression signatures of metabolic genes in CHO parental cell lines.** a)  
648 The enrichment of various metabolic pathways in the CHO genome-scale network at both  
649 transcript and protein level and b) the differential expression of various genes from central  
650 metabolism, de novo purine biosynthesis and sterol metabolism at transcript and protein levels are  
651 shown in the metabolic map, and c) comparison of intracellular metabolite levels in DG44 and K1.

652  
653 **Figure 5. Glycosylation differences between the CHO parental cell lines.** a) N-glycosylation  
654 differences, b) O-glycosylation differences, c) the differentially expressed genes and  
655 corresponding glycan species in N-glycosylation pathway, d) differentially expressed genes in O-

656 glycan pathway and e) the biosynthetic pathway of nucleotide-sugar donors. The glycans enclosed  
657 in boxes in (c) were detected in our experiments.

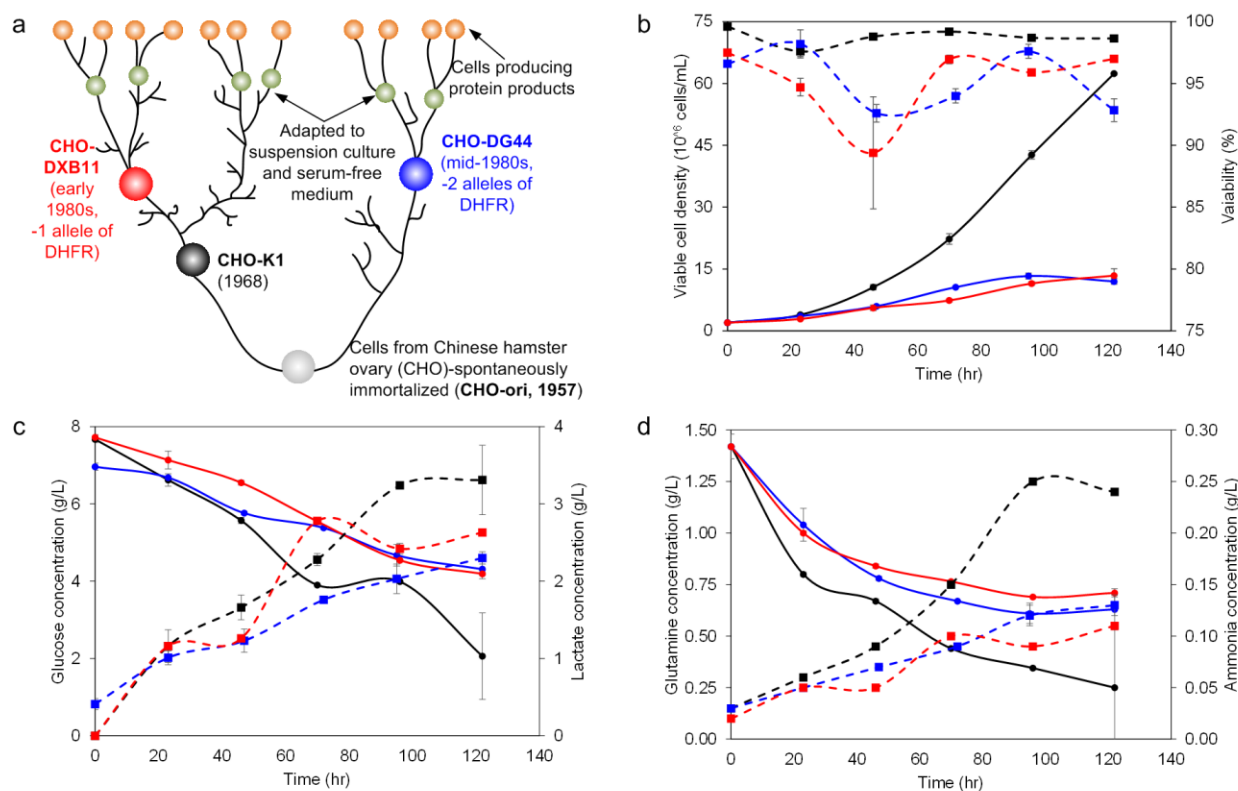

658

659 **Figure 1. Genetic and phenotypic differences of CHO parental cell lines.** a) The known genetic  
660 background of the three CHO cell lines studied, i.e. CHO-K1, DG44 and DXB11 (figure re-drawn  
661 based on Wurm and Hacker, 2011), b) viable cell densities and % viabilities of three parental cell  
662 lines grown in suspension cultures, c) residual concentrations of glucose and lactate, and d)  
663 concentration of glutamine and ammonia in the three cell cultures. The black, blue and red lines in  
664 each graph represent the CHO-K1, DG44 and DXB11 cell lines, respectively.  
665

a

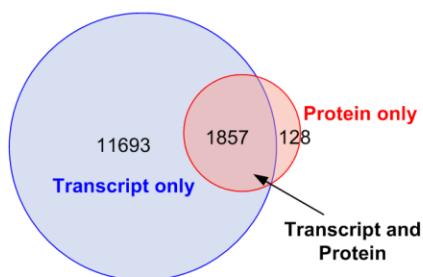

b

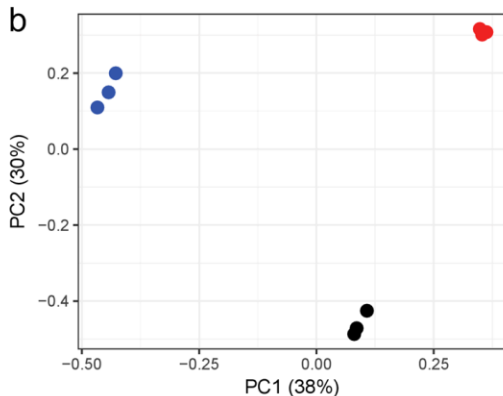

c

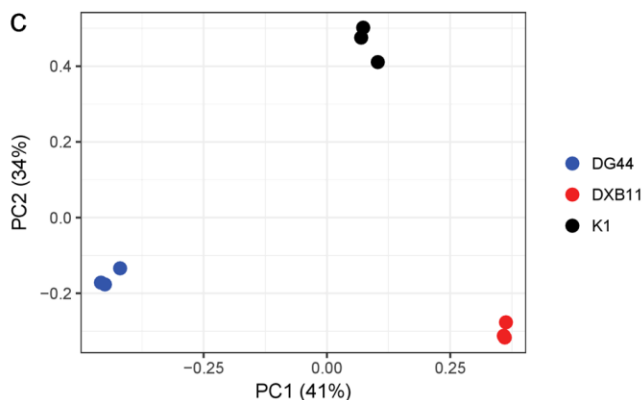

d

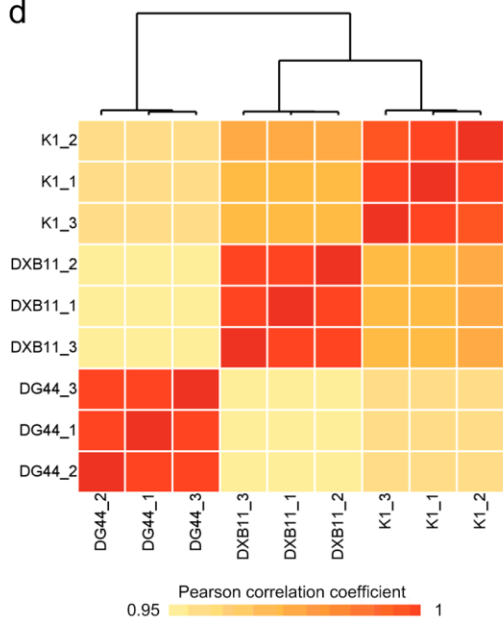

e

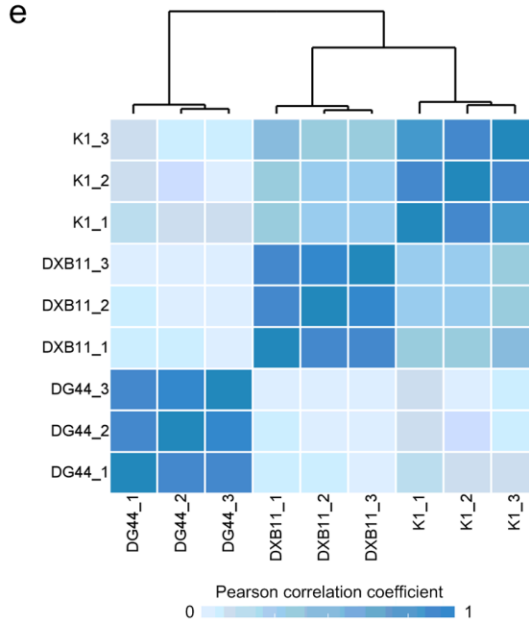

666

667 **Figure 2. Global mRNA and protein expression patterns of CHO parental cell lines.** a) Global  
668 coverage of transcriptome and proteome data, b) PCA of the transcriptome, c) PCA of the proteome,  
669 d) hierarchical clustering of transcriptome and e) hierarchical clustering of proteome. Clustering  
670 was based on Euclidean distance of Pearson correlation coefficients.



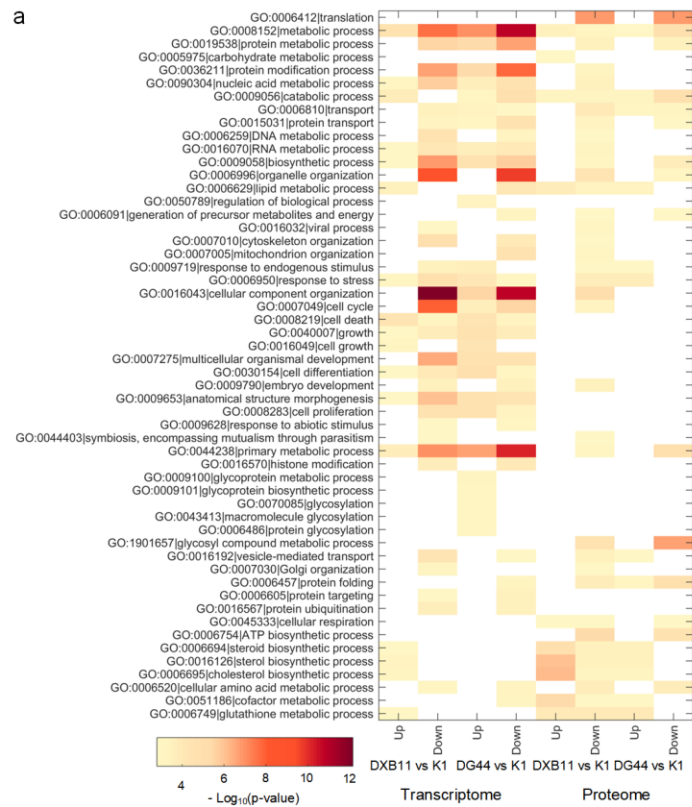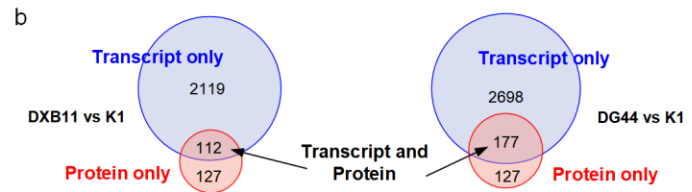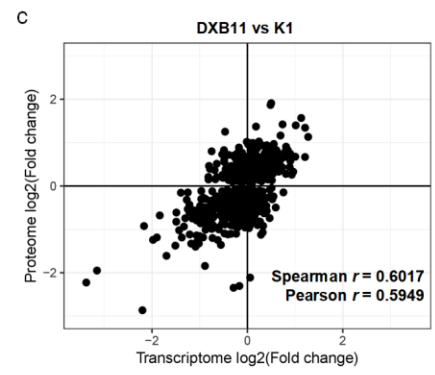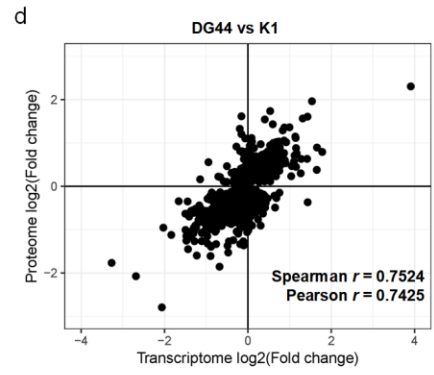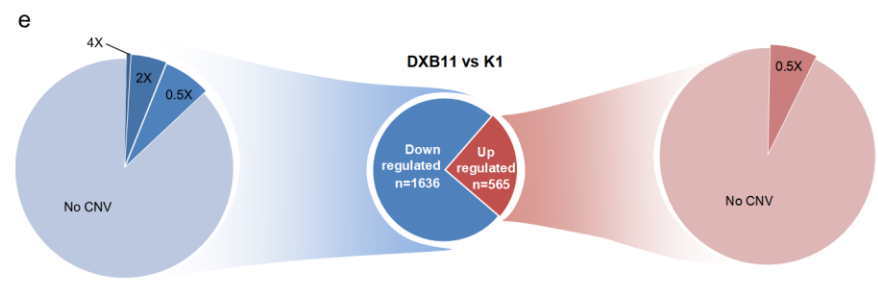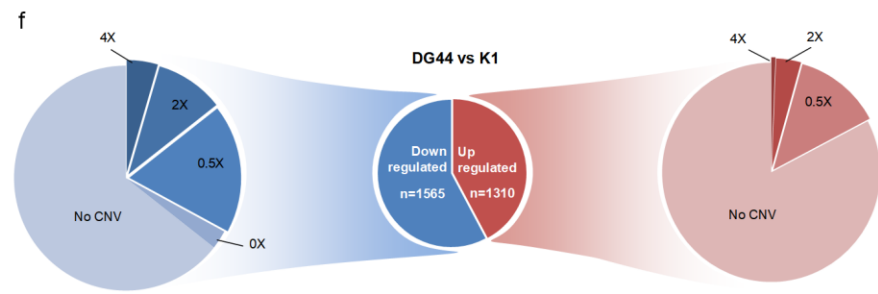

671  
 672 **Figure 3. Differential expression signatures of CHO parental cell lines.** a) GO enrichment analysis of differentially expressed genes  
 673 at both transcript and protein level , b) number of differentially expressed genes at transcript and protein level in DXB11 and DG44 w.r.t.  
 674 K1, c) correlation between transcript and protein expression ratios in DXB11 vs K1, d) correlation between transcript and protein  
 675 expression ratios in DG44 vs K1, e) the effect of genomic variations in differentially expressed genes at the transcript level in DXB11  
 676 vs K1 comparison and f) the effect of genomic variations in differentially expressed genes at the transcript level in DG44 vs K1  
 677 comparison.

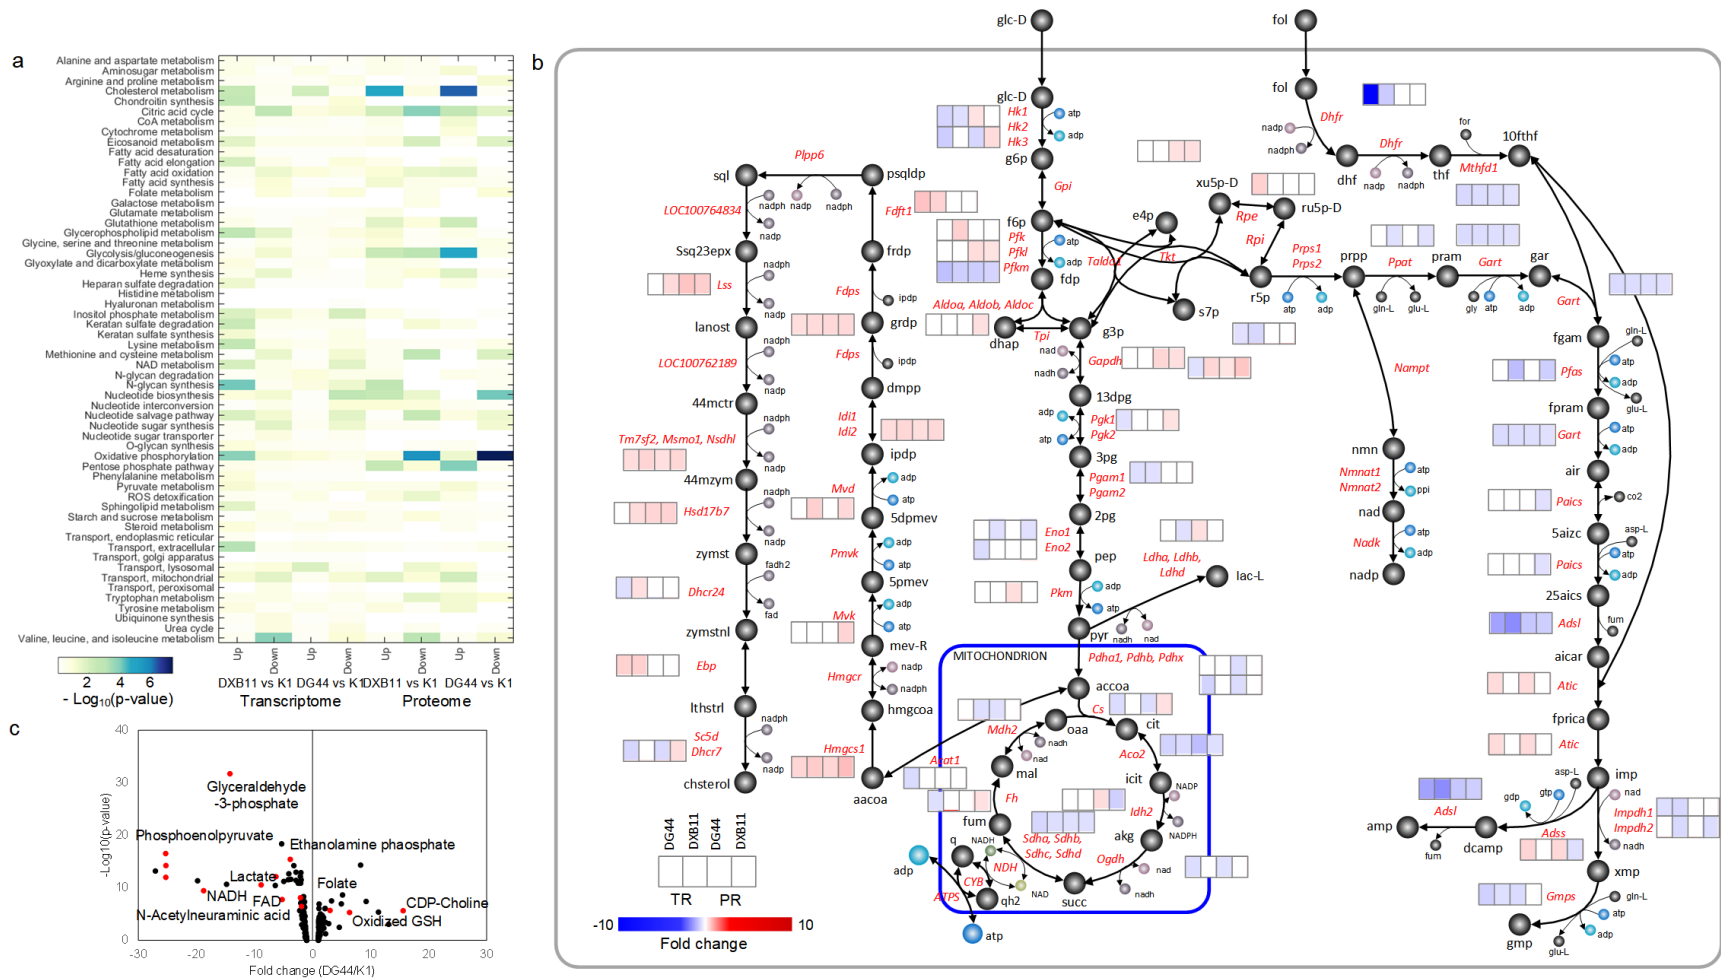

678  
 679 **Figure 4. Differential expression signatures of metabolic genes in CHO parental cell lines.** a) The enrichment of various metabolic  
 680 pathways in the CHO genome-scale network at both transcript and protein level and b) the differential expression of various genes from  
 681 central metabolism, *de novo* purine biosynthesis and sterol metabolism at transcript and protein levels are shown in the metabolic map,  
 682 and c) comparison of intracellular metabolite levels in DG44 and K1.

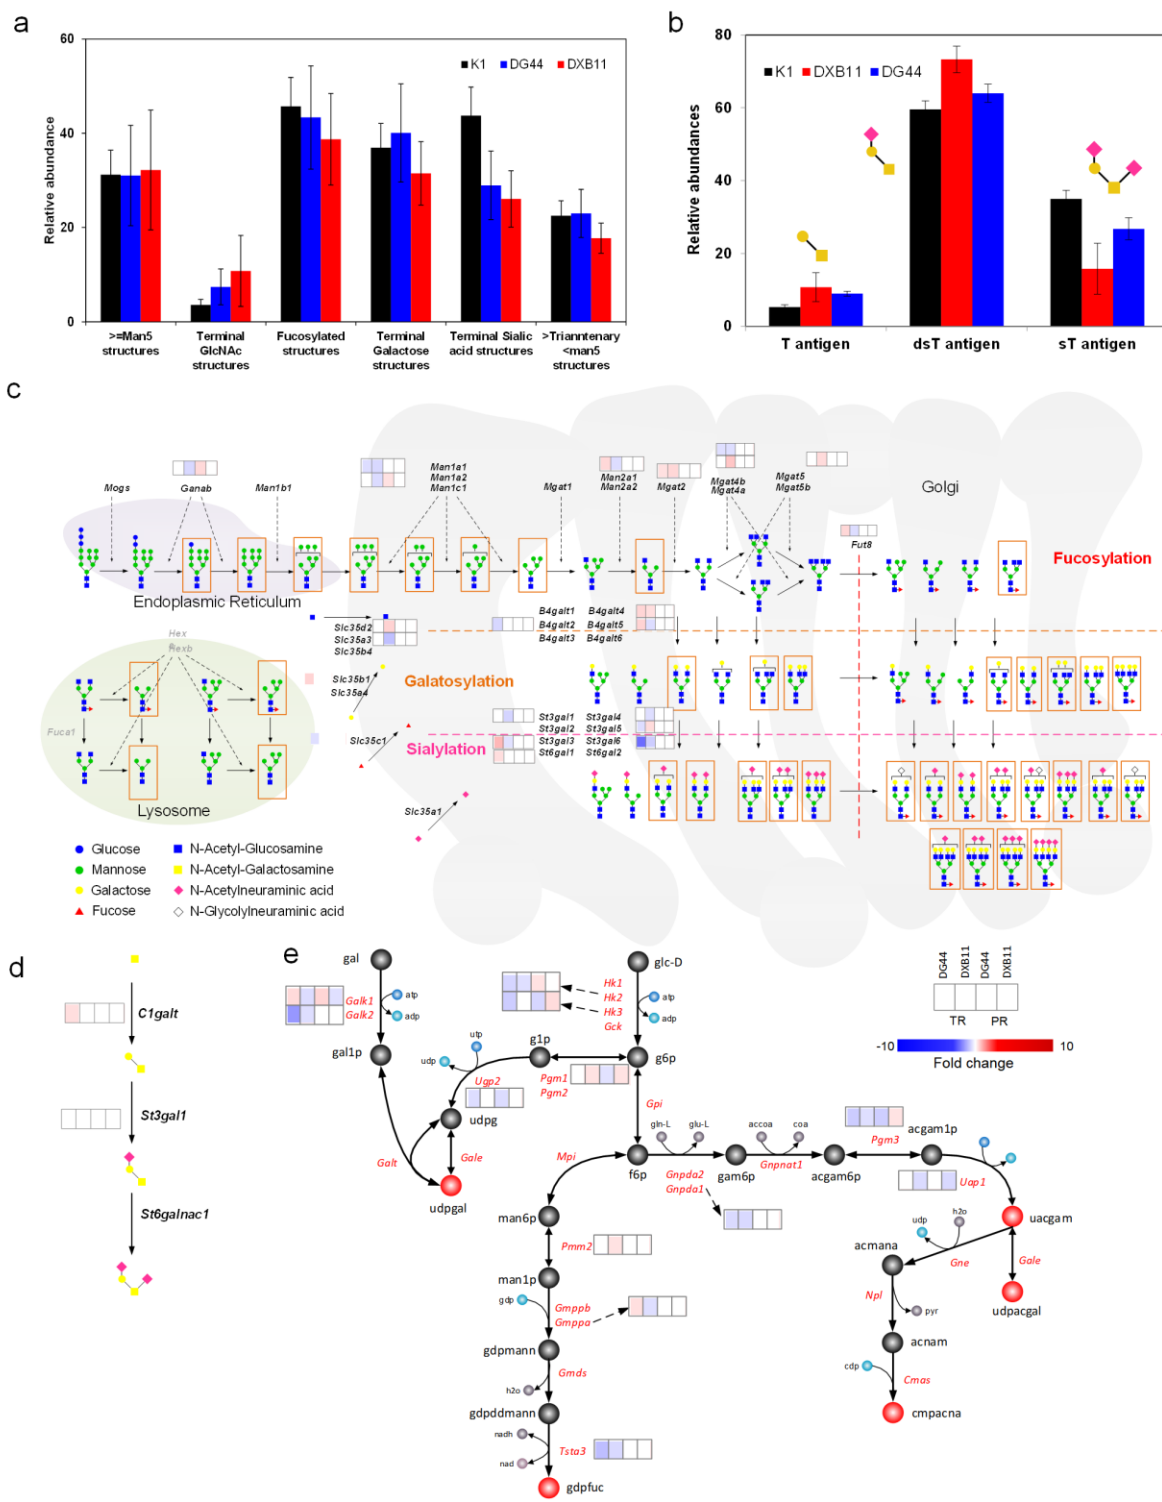

683

684 **Figure 5. Glycosylation differences between the CHO parental cell lines.** a) N-glycosylation  
 685 differences, b) O-glycosylation differences, c) the differentially expressed genes and  
 686 corresponding glycan species in N-glycosylation pathway, d) differentially expressed genes in O-  
 687 glycan pathway and e) the biosynthetic pathway of nucleotide-sugar donors. The glycans enclosed  
 688 in boxes in (c) were detected in our experiments.

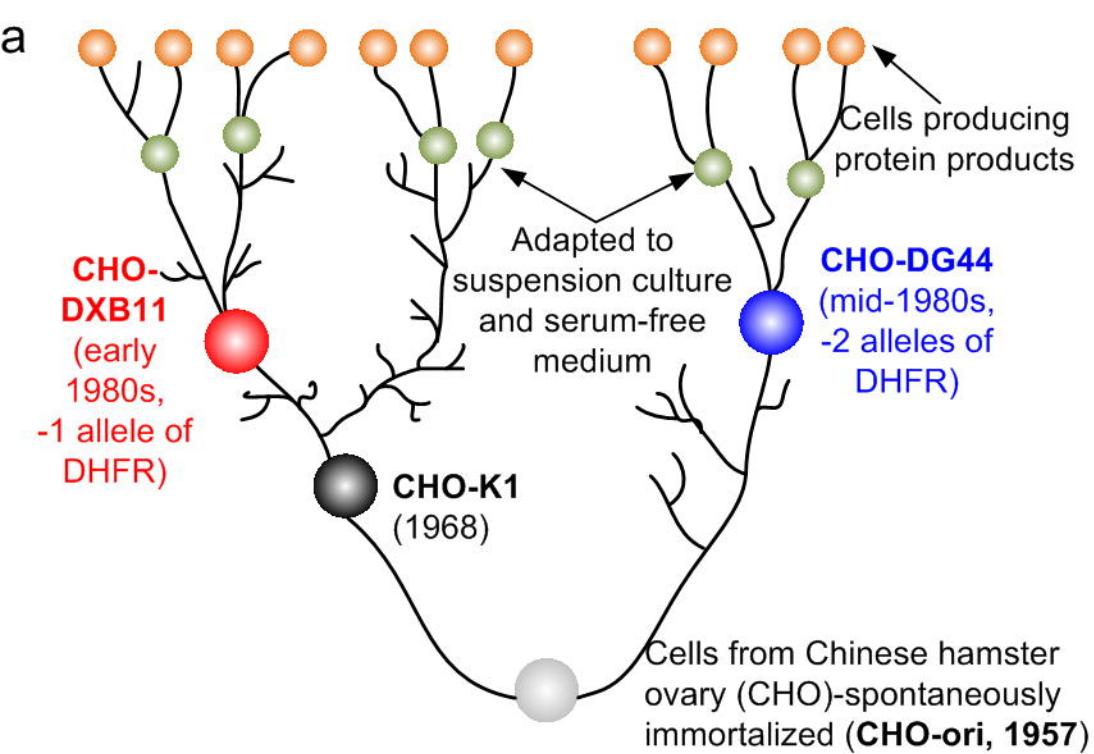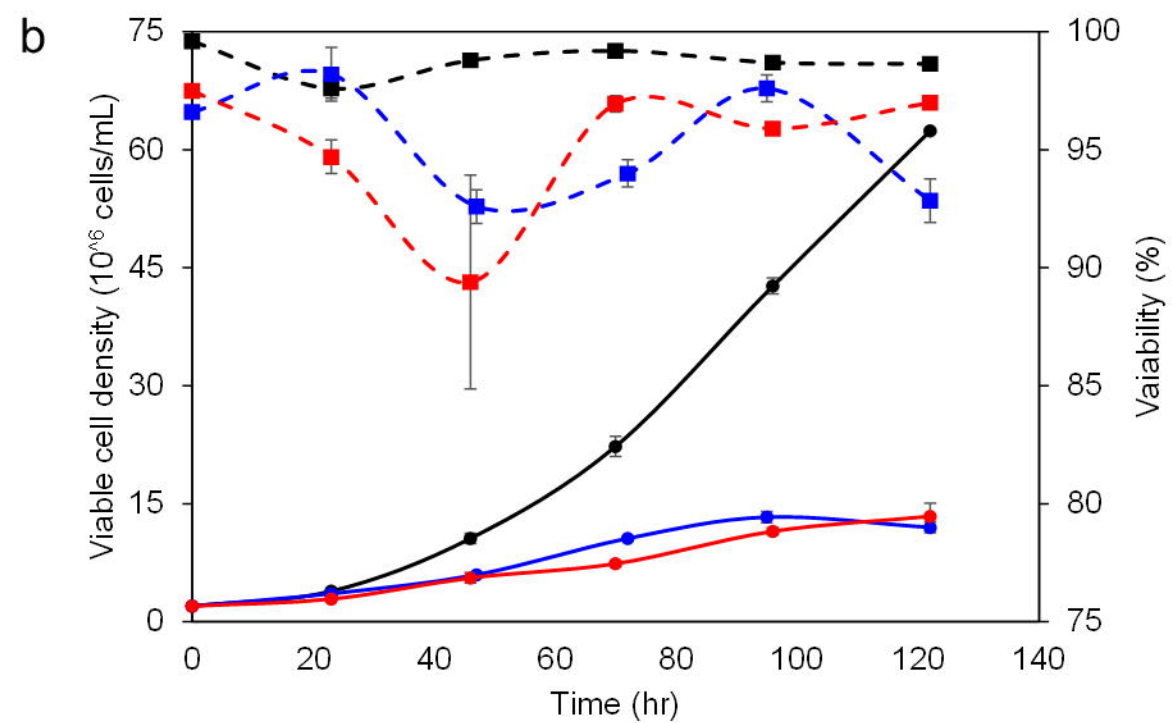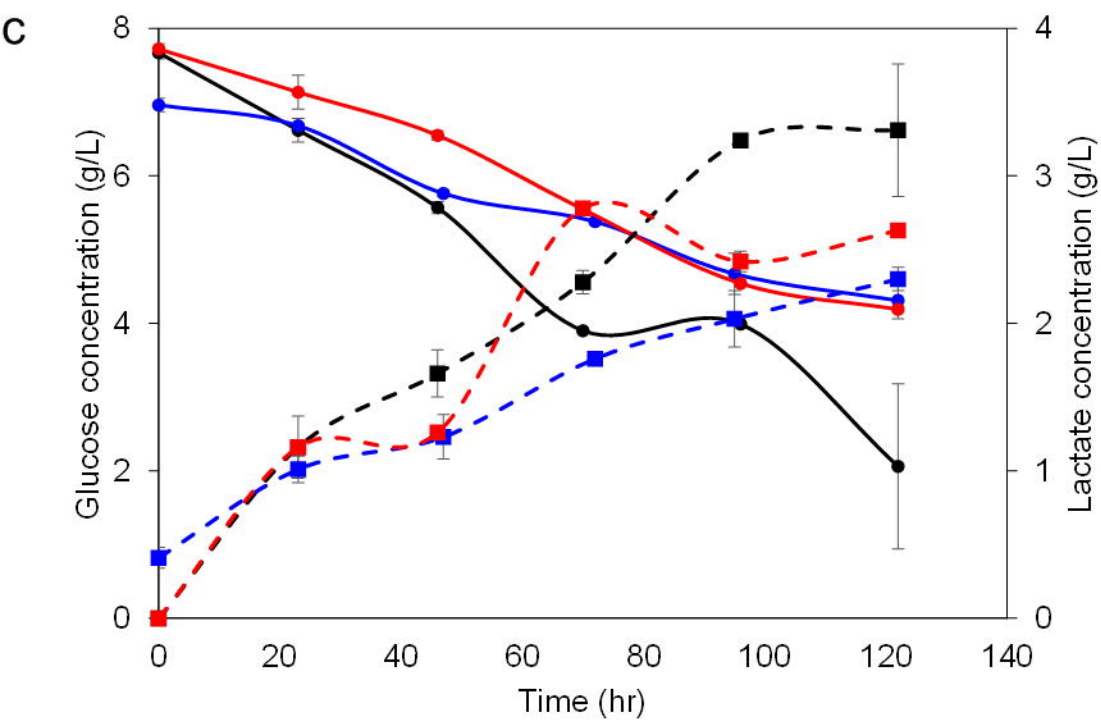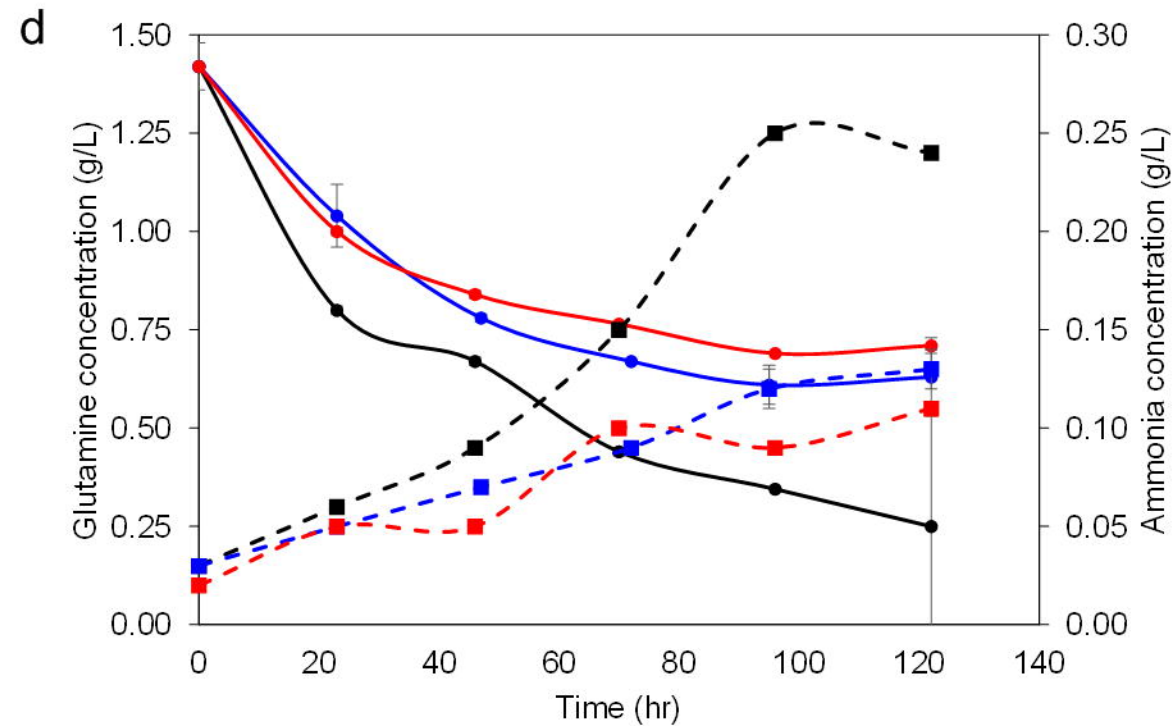





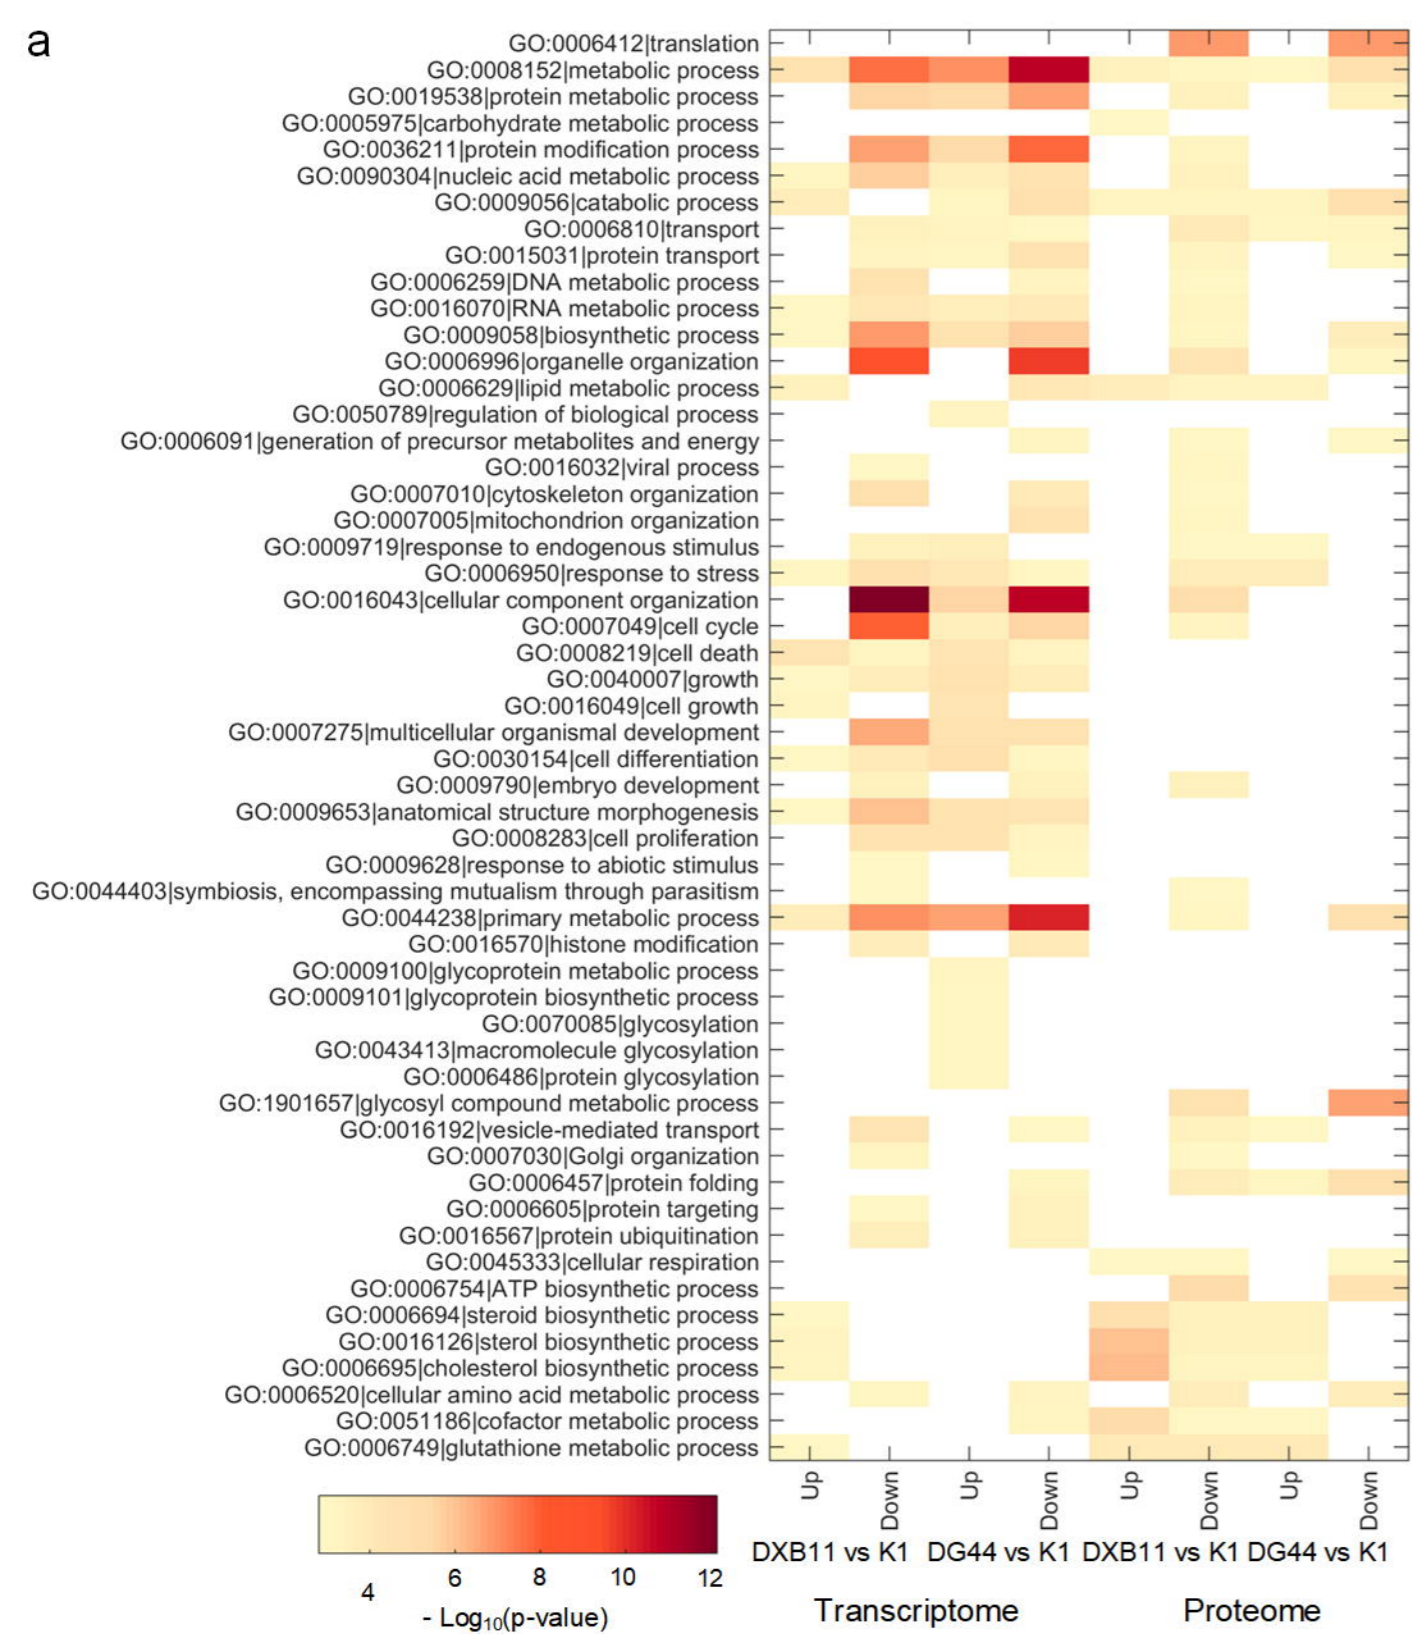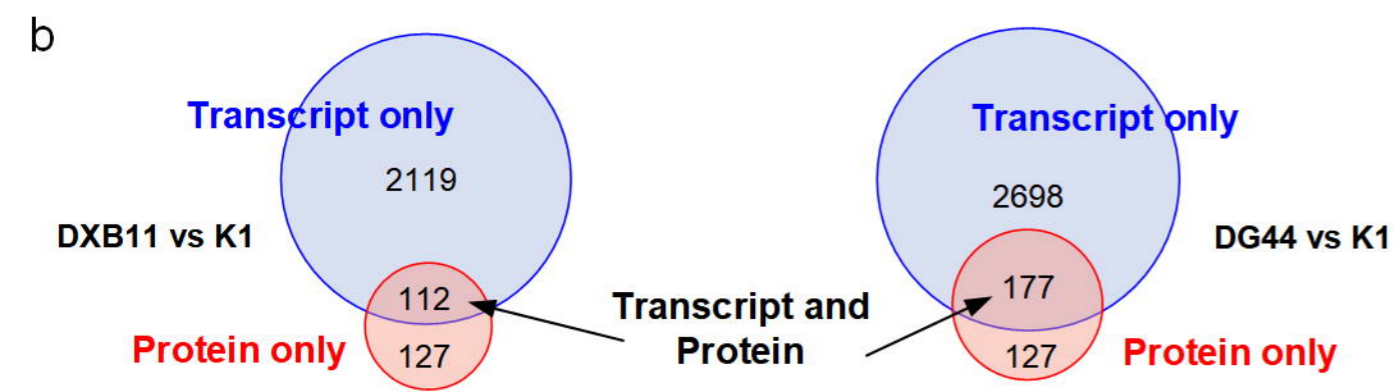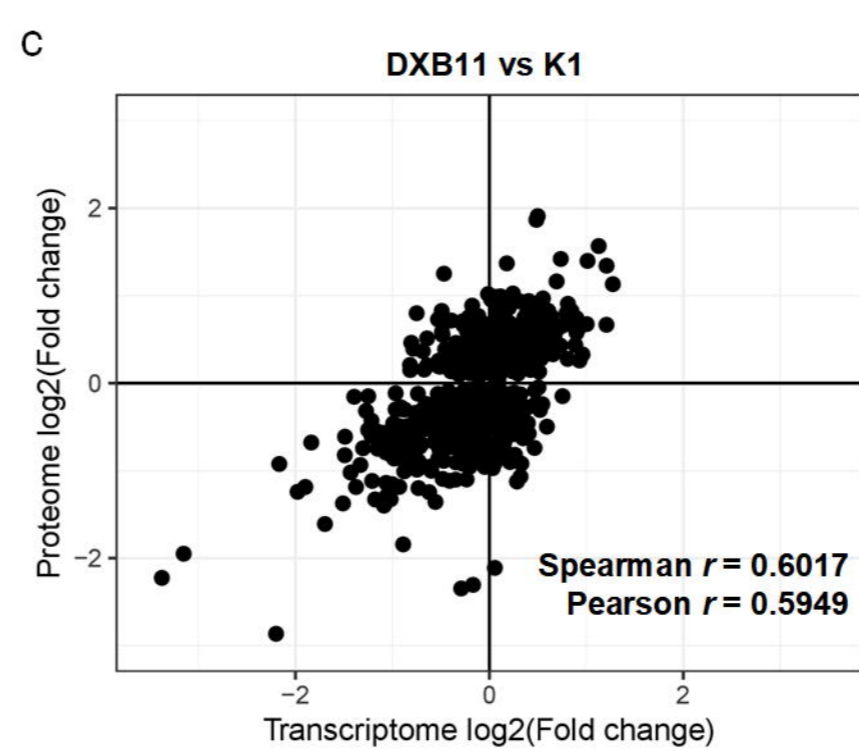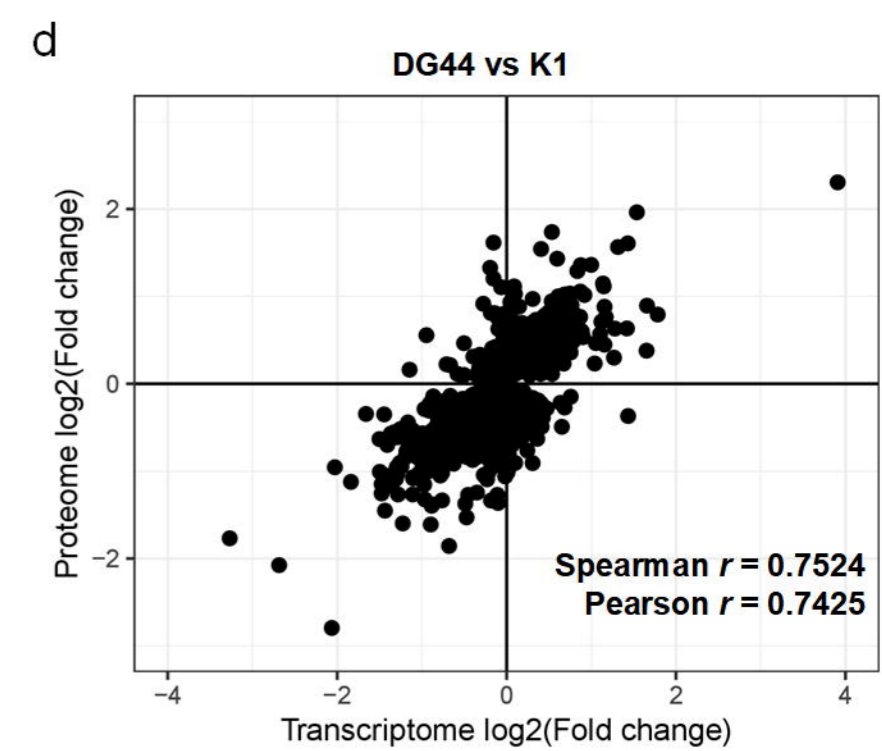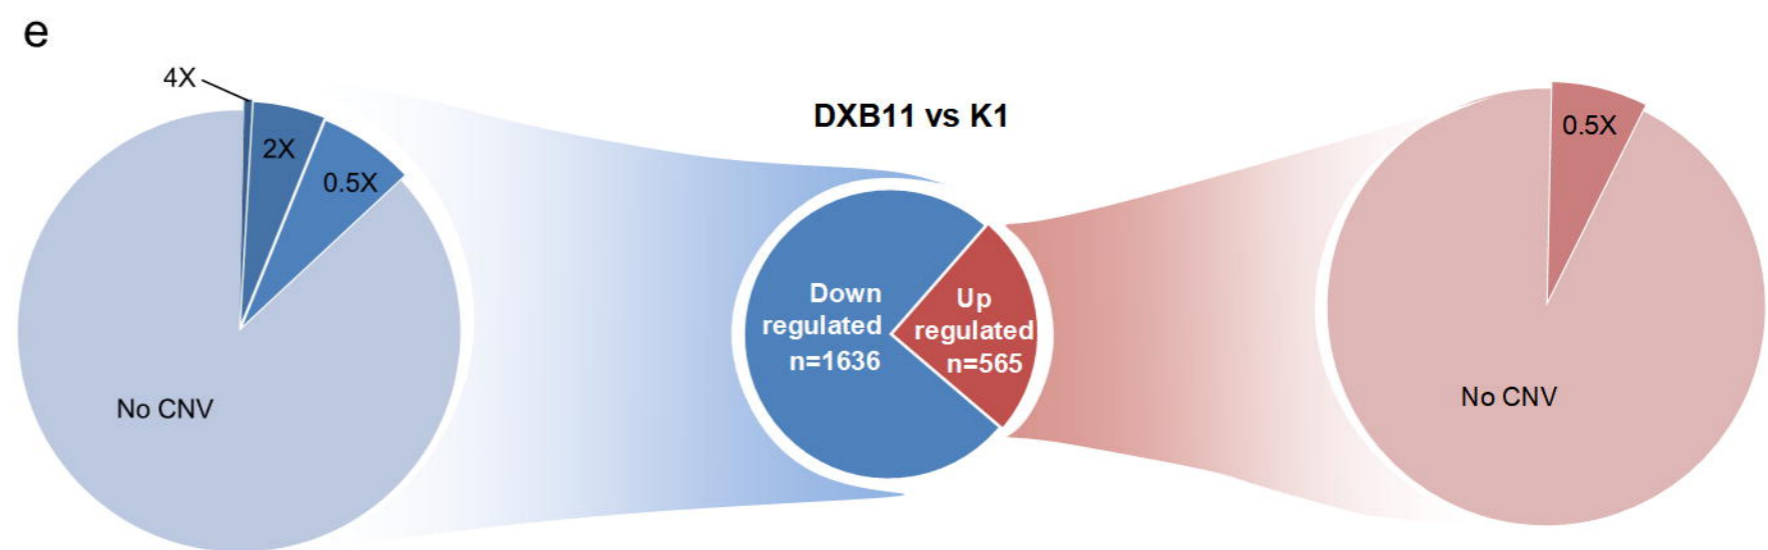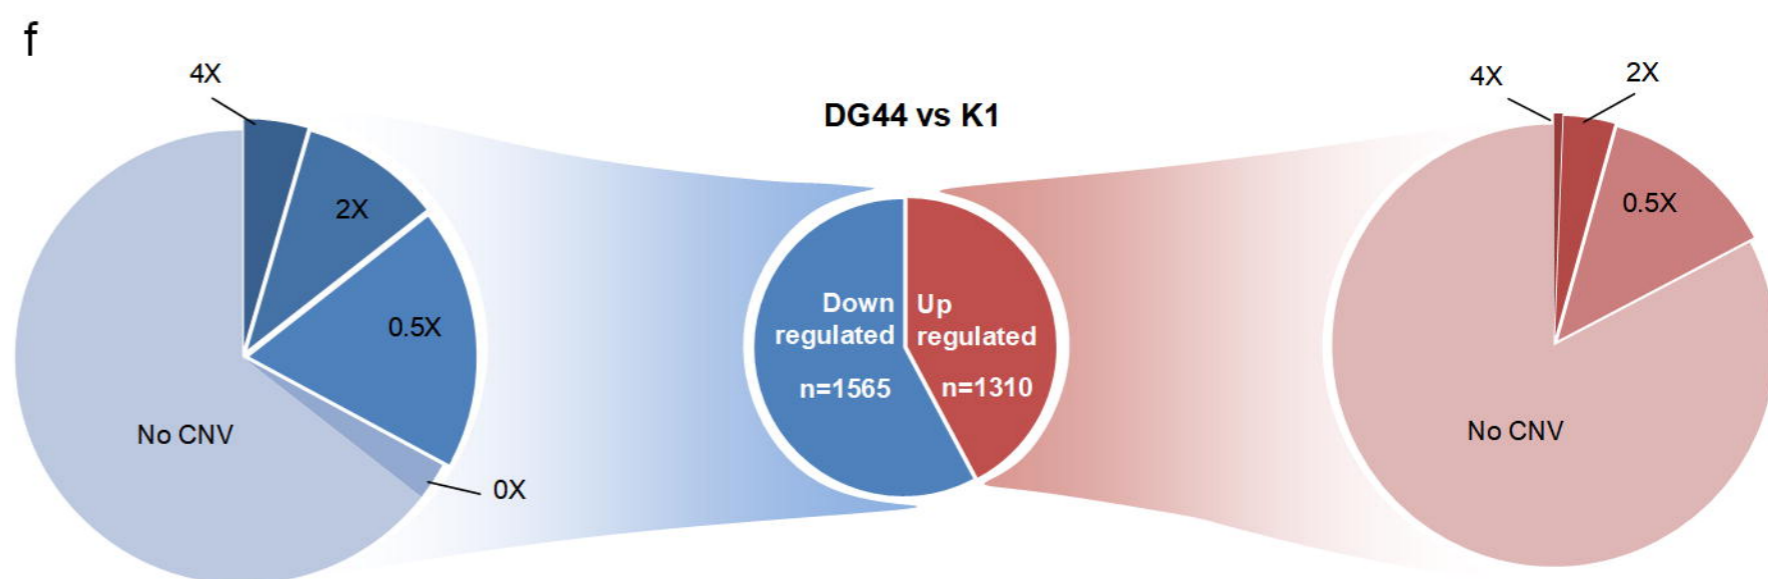







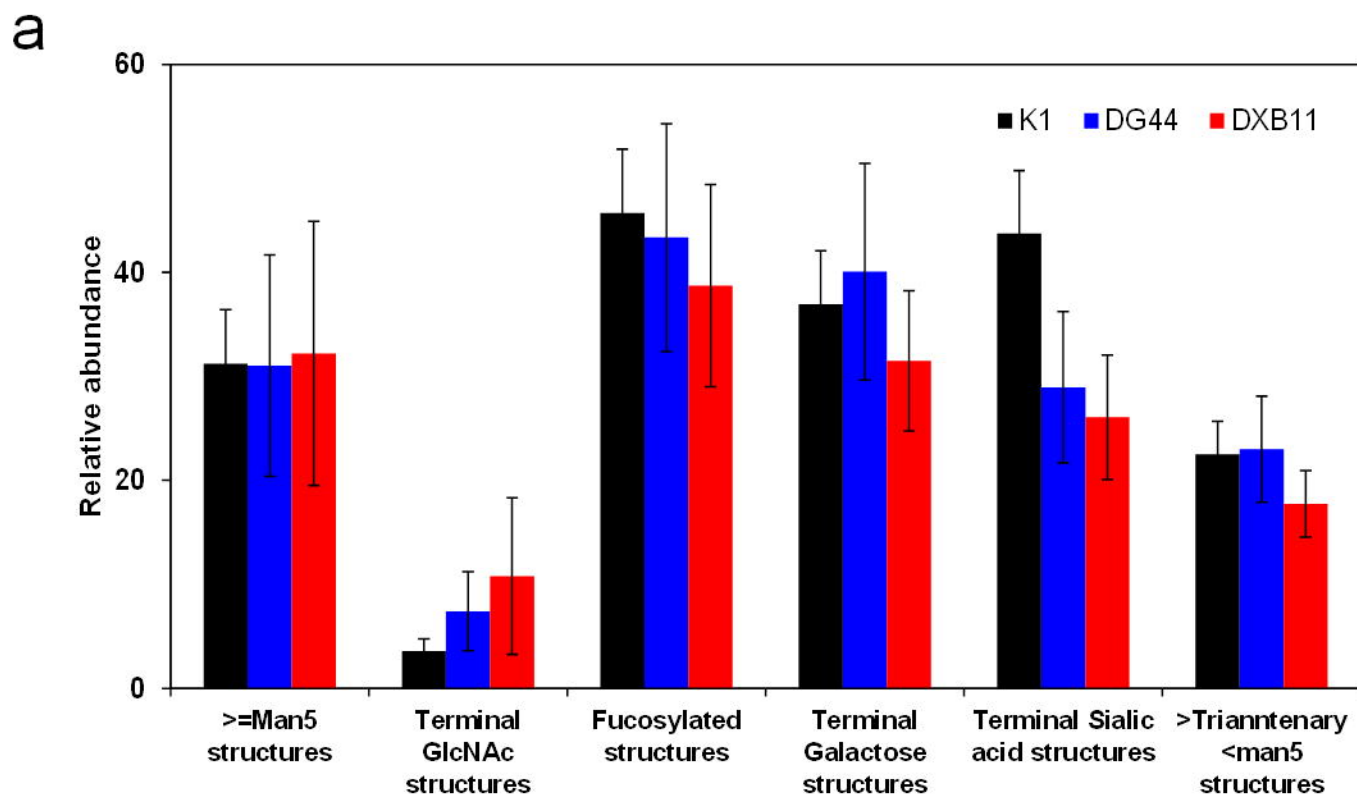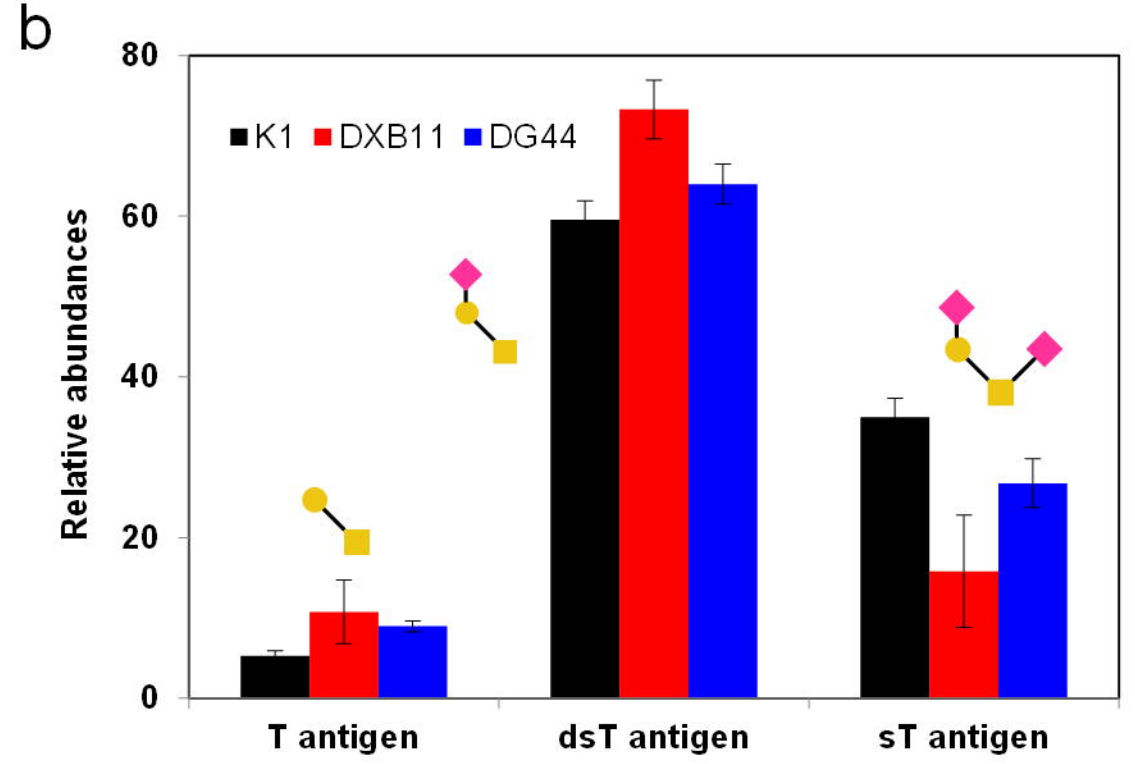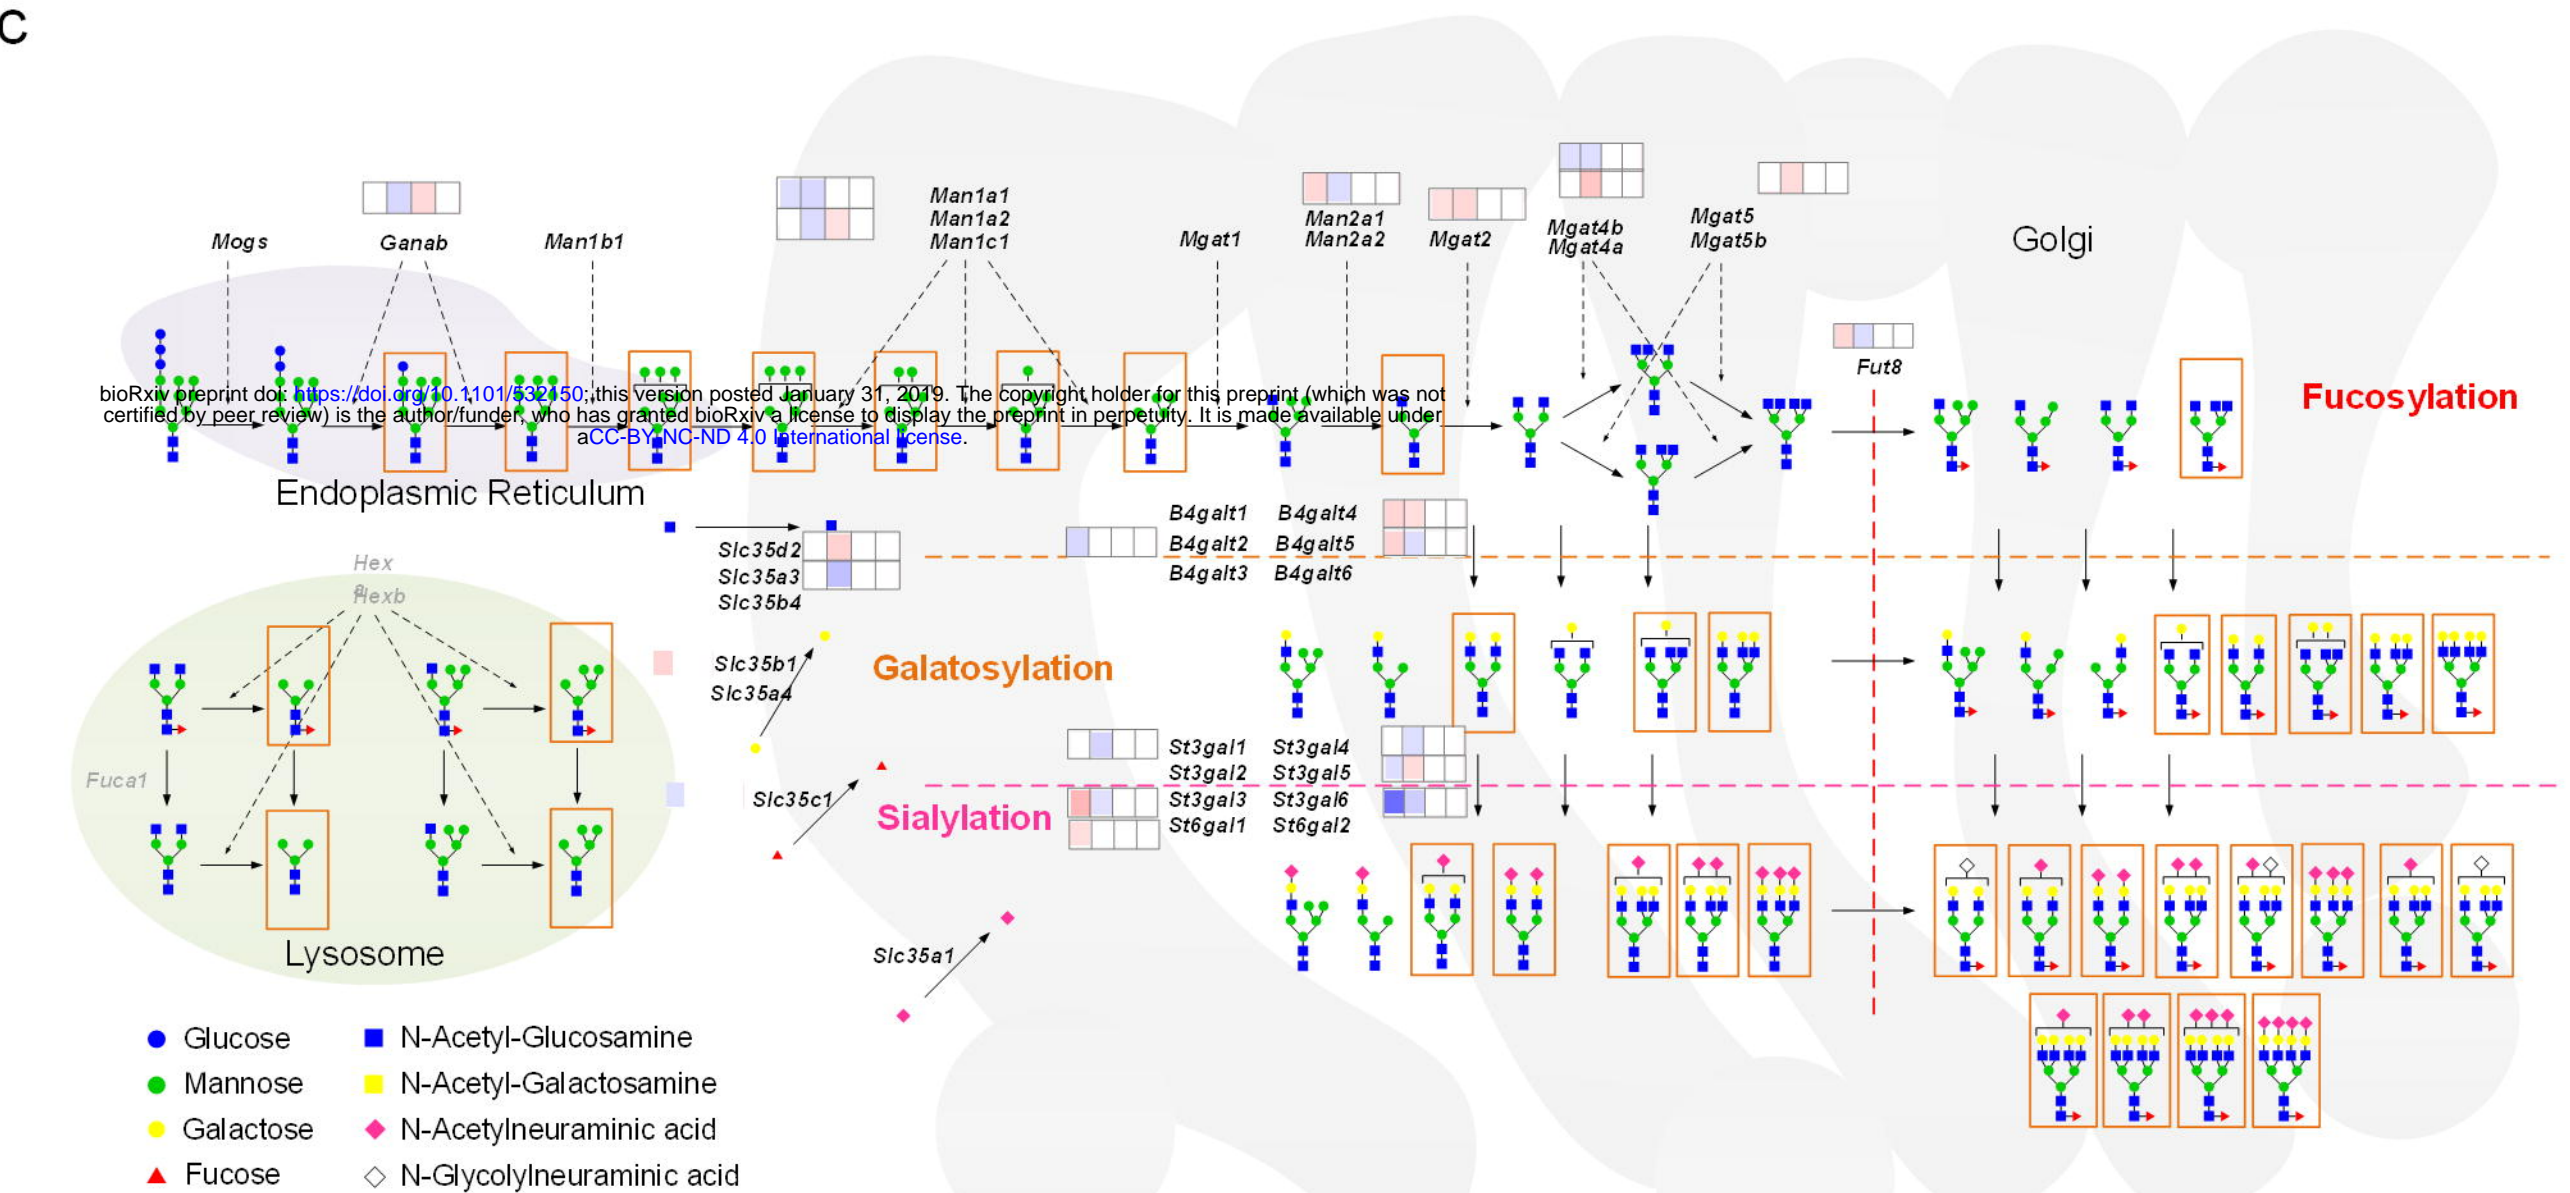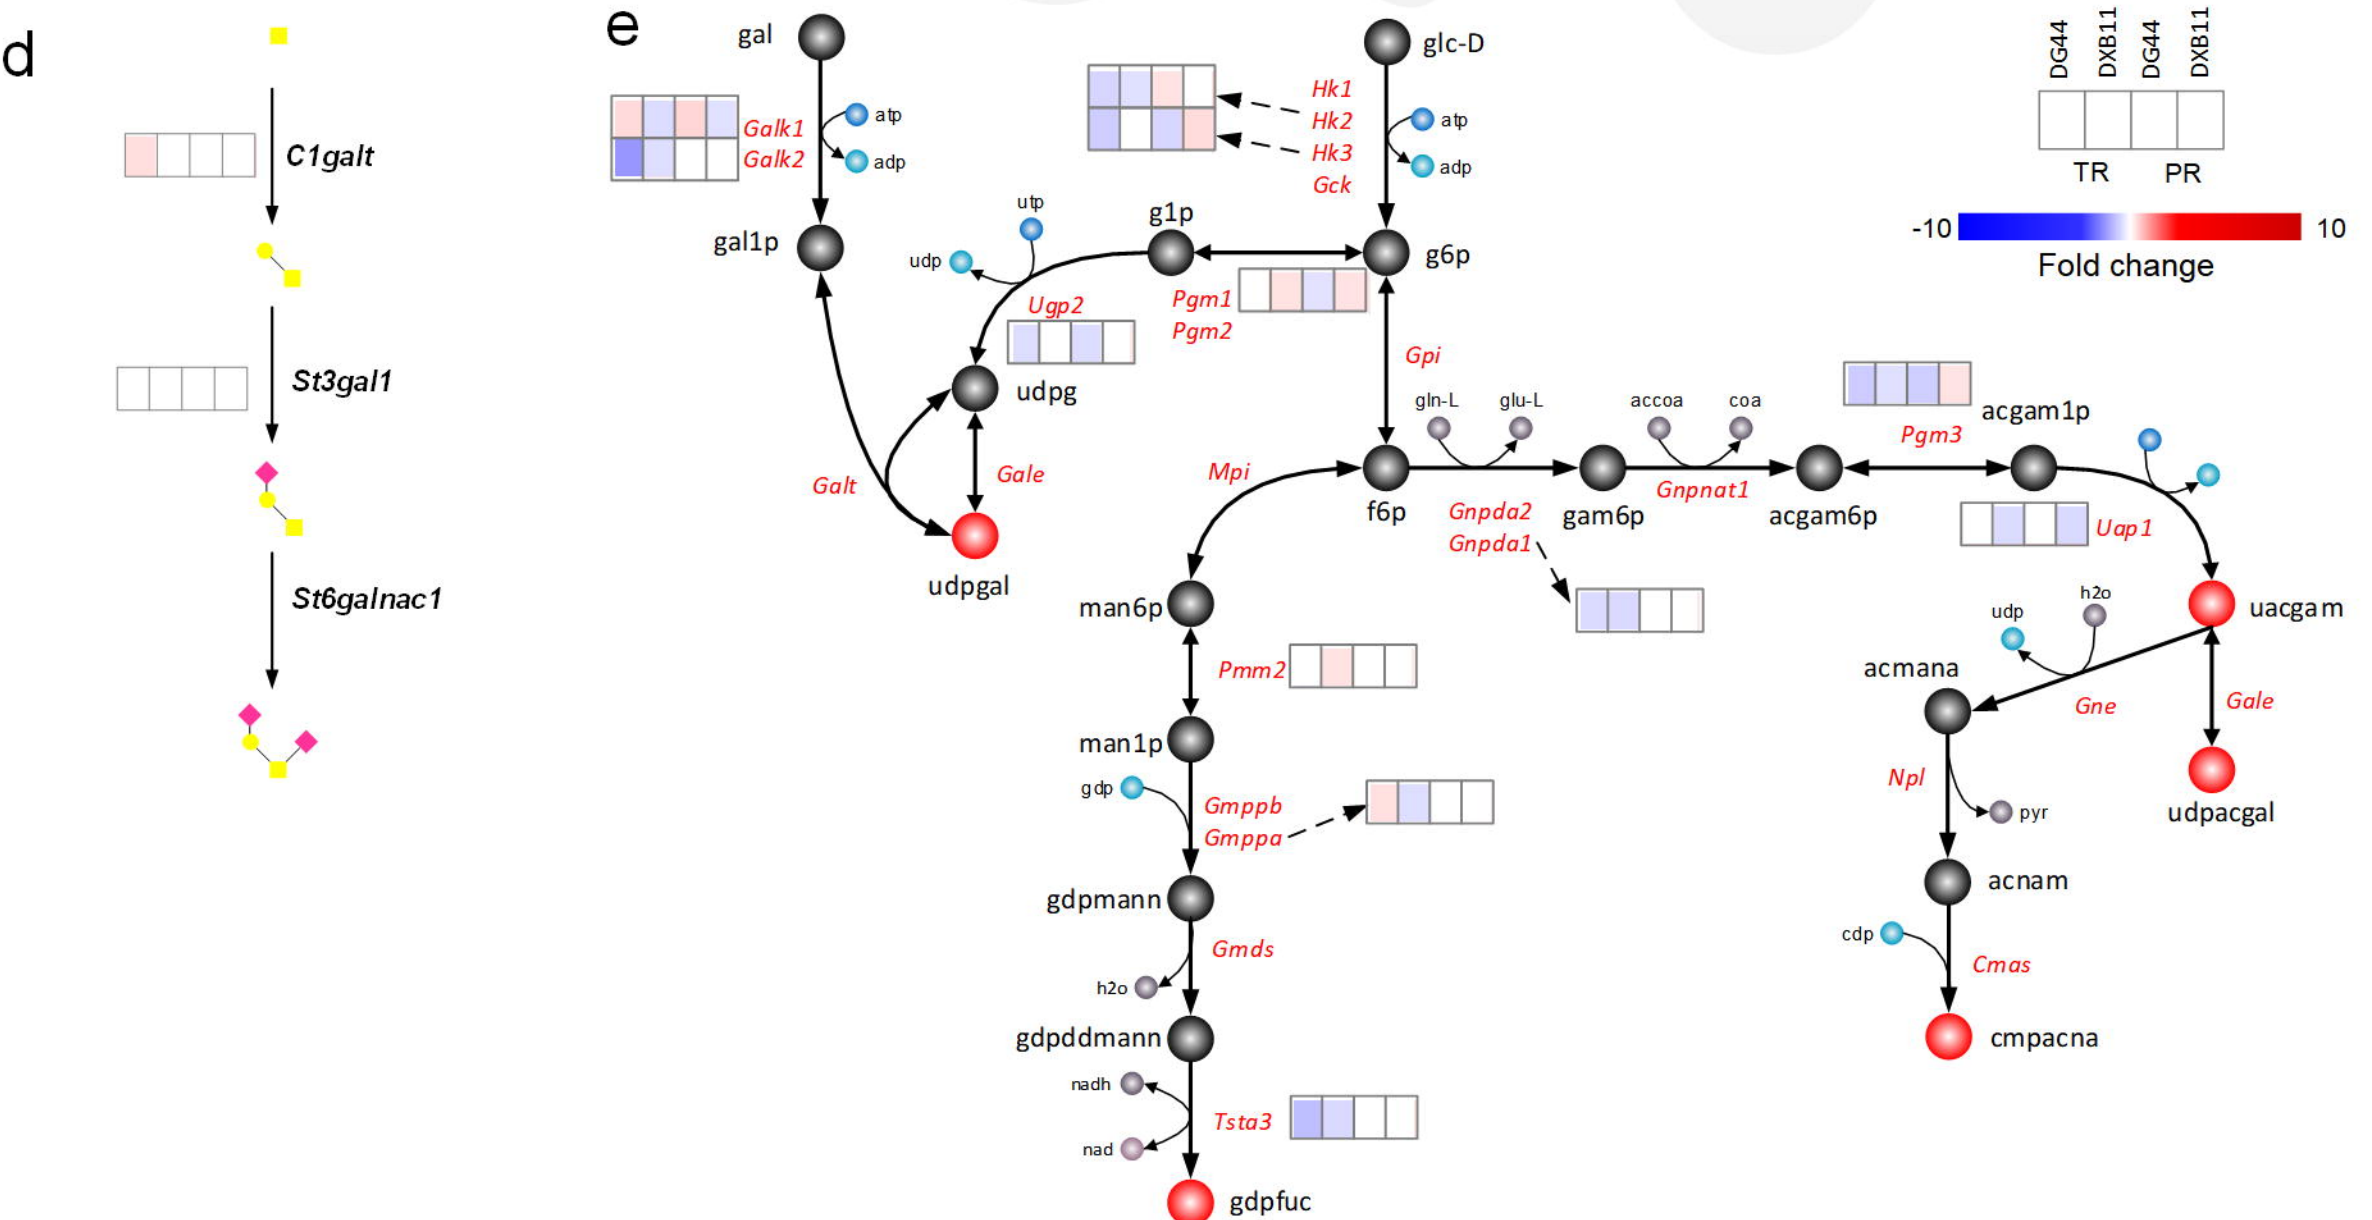

Source: https://biorxiv.org/content/biorxiv/early/2019/01/31/532150.full-text.pdf
